1 **Short title:** Functions of CKXs in rice growth and development

2 **Corresponding author:** Chengqiang Ding ([dingcq@njau.edu.cn](mailto:dingcq@njau.edu.cn))

3 **Cytokinin oxidase/dehydrogenase family genes play important roles in the growth and development of**  
4 **rice<sup>1</sup>**

5 **Chenyu Rong,<sup>a</sup> Yuexin Liu,<sup>a,2</sup> Zhongyuan Chang,<sup>a</sup> Ziyu Liu,<sup>a</sup> Yanfeng Ding,<sup>a,b,c</sup> and Chengqiang Ding<sup>a,b,c,3,4</sup>**

6 <sup>a</sup>College of Agriculture, Nanjing Agricultural University, Nanjing 210095, People's Republic of China

7 <sup>b</sup>Key Laboratory of Crop Physiology Ecology and Production Management, Ministry of Agriculture, Nanjing

8 210095, People's Republic of China

9 <sup>c</sup>Jiangsu Collaborative Innovation Center for Modern Crop Production, Nanjing 210095, People's Republic of

10 China

11 <sup>1</sup>This work was supported by the National Natural Science Foundation of China (Grant number 31872855 and  
12 31971842).

13 <sup>2</sup>Present address: National Key Laboratory of Crop Genetic Improvement, Huazhong Agricultural University,  
14 Wuhan 430070, People's Republic of China

15 <sup>3</sup>Senior author.

16 <sup>4</sup>Author for contact: [dingcq@njau.edu.cn](mailto:dingcq@njau.edu.cn).

17 The author responsible for distribution of materials integral to the findings presented in this article in accordance

18 with the policy described in the Instructions for Authors ([www.plantphysiol.org](http://www.plantphysiol.org)) is: Chengqiang Ding

19 ([dingcq@njau.edu.cn](mailto:dingcq@njau.edu.cn)).

20 **One sentence summary:** Cytokinin oxidase/dehydrogenase family genes exhibit functional divergence and

21 overlap in rice growth and development.

22 **Author contributions**

23 C.D. and Y.D. conceived the original screening and research plans; C.R., Y.L., Z.C., Z.L., and C.D. performed  
24 the experiments and analyzed the data; C.R. and C.D. wrote the article with contributions of all the authors; C.D.  
25 agrees to serve as the author responsible for contact and ensures communication.

26

27 **ABSTRACT**

28 Cytokinin has important functions during plant growth and development; hence, many researchers have  
29 extensively studied cytokinin biosynthesis and degradation. Cytokinin oxidase/dehydrogenases (CKXs) are a  
30 group of enzymes that regulate oxidative cleavage to maintain cytokinin homeostasis. In rice, 11 *OsCKX* genes  
31 have been identified to date; however, most of their functions remain unknown. Here, we comprehensively  
32 analyzed the expression patterns of *OsCKX* genes and their genetic relationships using RNA sequencing  
33 (RNA-seq) and  $\beta$ -glucuronidase (GUS) staining. Using CRISPR/Cas9 technology, we constructed nine *osckx*  
34 mutants to determine the *OsCKX* function in rice development. Results revealed that each *OsCKX* gene has a  
35 unique expression pattern. Furthermore, the single *osckx* and higher-order *osckx4 osckx9* mutant lines showed  
36 functional overlap and subfunctionalization. Mutant phenotypes associated with decreased CKX activity  
37 exhibited changes in leaf and root growth, inflorescence architecture, fertilization, and grain weight. Notably, we  
38 found that the *osckx1 osckx2* and *osckx4 osckx9* double mutants displayed contrasting phenotypic changes in  
39 tiller number, culm diameter, and panicle size as compared to the wild-type (WT). Moreover, we identified  
40 several genes that were significantly expressed in *osckx4* and *osckx9* single and double mutant plants. Many  
41 differentially expressed genes, such as *OsPIN2*, *OsRR4*, and *OsNRT2.3*, were found to be associated with auxin,  
42 cytokinin, and nitrogen pathways. Therefore, our findings provide new insights on the functions of *OsCKX* genes  
43 in rice growth, that may be used as a foundation for future studies aimed at improving rice yield and initiating  
44 green production.

45

## 46 INTRODUCTION

47 Cytokinin controls plant growth and development by promoting plant cell division, growth, and differentiation.  
48 Specifically, it is responsible for stem enlargement and differentiation, organ development and structure,  
49 nutrition absorption, senescence, and stress response. Cytokinin biosynthesis starts from the ADP, ATP, or tRNA  
50 catalyzed by different adenosine phosphate isopentenyltransferases and activated by LONELY GUY enzymes  
51 (Kurakawa et al., 2007; Osugi et al., 2017). Previous studies reported that in rice, overexpression of adenosine  
52 phosphate isopentenyltransferase inhibited root formation (Sakamoto et al., 2006), while *lonely guy* mutants  
53 developed smaller panicles with reduced branches and floral organ defects (Kurakawa et al., 2007).

54 After performing its function, cytokinin is inactivated by certain enzymes such as cytokinin  
55 oxidase/dehydrogenases (CKXs) that induce cytokinin oxidative cleavage, which is an irreversible process.  
56 Cytokinin can also be inactivated by combining with sugars, including *O*-glucosyltransferase (reversible process)  
57 and *N*-glucosyltransferase (irreversible process) (Kudo et al., 2012). However, this inactivation process occurs at  
58 different stages of plant development in various tissues and employs several enzymes with similar functions,  
59 most of which remain unknown. CKXs are essential for maintaining cytokinin homeostasis during plant growth  
60 and development. Therefore, extensive research on CKXs has been conducted and is still ongoing. Each plant  
61 species has a group of *CKX* genes, for example, *Arabidopsis* has seven, rice has 11, and maize has 13. Most  
62 CKXs in maize and *Arabidopsis* have putative N-terminal secretory peptides that assist in locating the  
63 endoplasmic reticulum (ER) (Zalabak et al., 2016; Niemann et al., 2018). Previous studies have discovered  
64 several functions of CKXs in *Arabidopsis* and other crops. In *Arabidopsis*, overexpression of *AtCKX1* and  
65 *AtCKX2* resulted in smaller shoots, larger roots, and smaller shoot apical meristems (SAMs), while *AtCKX7*  
66 overexpression resulted in shorter primary roots (Werner et al., 2001; Kollmer et al., 2014). Furthermore, *ckx3*  
67 *ckx5* mutants developed larger SAMs and more siliques (Bartrina et al., 2011). On the other hand, sextuple *ckx3*

68 *ckx5* mutants of oilseed rape showed larger and more active inflorescence meristems (Schwarz et al., 2020). In  
69 barley, *HvCKX1* downregulation resulted in more spikes, more grains per spike, and higher 1,000-grain weight  
70 (Zalewski et al., 2010). *TaCKX6-D1* was found to be associated with grain filling and grain size in wheat (Zhang  
71 et al., 2012).

72 In rice, *OsCKX2/Gn1a* was the first *CKX* gene identified. Rice varieties with low *OsCKX2* expression  
73 yielded more grains per panicle, while *OsCKX2* downregulation or *osckx2* mutation produced more tillers, more  
74 grains per panicle, and heavier grains (Ashikari et al., 2005; Yeh et al., 2015). In contrast, *OsCKX4*  
75 overexpression reduced the tiller number, grain number per panicle, grain weight, and plant height and increased  
76 the number of roots (Gao et al., 2014). On the other hand, *osckx9* mutants developed more tillers and smaller  
77 panicles, while *OsCKX9* overexpression mutants displayed more tillers, shorter culms, smaller panicles, and  
78 lower setting rates (Duan et al., 2019). *OsCKX11* was found to regulate leaf senescence and grain number, while  
79 *osckx11* mutation resulted in the increased number of spikelets per panicle and tillers (Zhang et al., 2020). The  
80 expression of *CKX* genes is regulated by several transcription factors. For example, *OsCKX2* expression is  
81 controlled by zinc finger transcription factor DROUGHT AND SALT TOLERANCE and VIN3-LIKE 2 (Li et al.,  
82 2013; Yang et al., 2018), while the rice NAC family transcription factor OsNAC2 regulates *OsCKX4* expression  
83 (Gao et al., 2014; Mao et al., 2020).

84 *OsCKX* genes play an important role in the crosstalk between cytokinin and other hormones by regulating  
85 cytokinin content in plant tissues, maintaining plant hormone homeostasis, and controlling plant growth and  
86 development. Most *OsCKX* genes are upregulated by exogenous cytokinins, such as the naturally-occurring  
87 *trans*-zeatin (tZ) and *N*<sup>6</sup>-( $\Delta^2$ -isopentenyl)adenine (iP) or the synthetic 6-benzylaminopurine (Duan et al., 2019).  
88 *OsCKX4* can also be induced by auxin, which plays a role in regulating the root system (Gao et al., 2014). The  
89 auxin response factor OsARF25 and the type-B response regulators ORR2 and ORR3 regulate the expression of

90 *OsCKX4* downstream of auxin and cytokinin activation, respectively. However, *OsCKX4* overexpression can  
91 downregulate the expression of auxin-biosynthesis gene *OsYUCCA1* and auxin-transport genes *PIN FORMED1b*  
92 (*OsPIN1b*) and *OsPIN2* in the roots, showing the negative feedback between auxin and cytokinin. *OsCKX9* acts  
93 downstream of strigolactones (SLs) and plays a key role in the crosstalk between cytokinin and SLs. The  
94 SL-induced activation of *OsCKX9* relies on D53, which acts as a repressor of SL signaling and consequently  
95 functions in the SL-induced regulation of tiller development (Duan et al., 2019). On the other hand, *OsCKX11*  
96 has antagonistic roles between the cytokinin and abscisic acid (ABA) pathways during leaf senescence. In  
97 *osckx11* mutants, the downregulation of ABA biosynthesis genes and the upregulation of ABA degradation genes  
98 result in the reduction of ABA content in flag leaves and subsequently regulate leaf senescence, which shows the  
99 relationship between cytokinin and ABA. Thus, these findings demonstrate that *OsCKX* genes act as bridges  
100 between cytokinin and other plant hormones (Zhang et al., 2020).

101 *OsCKX* genes also respond to environmental changes and stressors. For example, high-concentration  
102 nitrogen treatment significantly increased *OsCKX* expression not only in nodes and leaves but also in young  
103 panicles (Ding et al., 2014; Xu et al., 2015), which also affected the tiller number and spikelets per panicle.  
104 Furthermore, *OsCKX1* and *OsCKX4* were found to be upregulated in nitrogen- and inorganic phosphate-starved  
105 roots, potentially affecting root system formation and assisting in the absorption of more nutrients (Shin et al.,  
106 2018). *OsCKX4* also plays a role in zinc absorption (Gao et al., 2019), while *OsCKX2* downregulation facilitates  
107 the adaptation to saline stress (Joshi et al., 2018). However, it is unknown whether *OsCKX* genes play other roles  
108 during rice growth and development. In rice breeding, *OsCKX2* has been artificially selected from wild rice since  
109 ancient times and can be divided into alleles from different geographic distributions (Ashikari et al., 2005; Wang  
110 et al., 2015). Since most plants with downregulated *CKX* expression exhibit better phenotypes, researchers  
111 believed that *CKX* is a potential target to improve yield or to initiate another “Green Revolution” (Ashikari et al.,

112 2005; Chen et al., 2020; Jameson and Song, 2020). Numerous studies have analyzed the structures of and genetic  
113 relationships between *OsCKXs*. However, the expression patterns that may determine their functions during plant  
114 growth, especially of *OsCKXs* with similar amino acid sequences, are yet to be elucidated.

115 In this study, we investigated the genetic relationships and expression patterns of *OsCKX* genes using RNA  
116 sequencing (RNA-seq). We also evaluated the phenotypes of *osckx* single and double mutants produced using  
117 CRISPR/Cas9 technology to determine the function of different *OsCKXs*. We also analyzed the transcriptomes of  
118 the roots and shoot bases from Nipponbare (NIP), *osckx4*, *osckx9*, and *osckx4/9* mutants to identify the genes  
119 downstream of *OsCKX4* and *OsCKX9*. Our findings may provide new insights regarding the potential  
120 application of *OsCKX* genes for improving agricultural traits.

121

122

## 123 RESULTS

### 124 *OsCKX* family genes display different expression patterns

125 Similar to the findings of previous studies, the *OsCKX* phylogenetic tree consisted of four major clades (Figure  
126 1A). *OsCKX1*, which is commonly expressed in the roots, flowers, and grains, and *OsCKX2* were grouped  
127 together in the first clade. The  $\beta$ -glucuronidase (GUS) staining results reveal that *OsCKX1* had high expression  
128 in the shoot base and top of axillary buds, but very low expression in the leaf blade (Figure 1B). On the other  
129 hand, *OsCKX2*, usually expressed at high levels in the leaf sheath and inflorescence, was found to be highly  
130 expressed in the lateral root primordium, leaf blade, shoot base and inflorescence. *OsCKX6*, *OsCKX7*, and  
131 *OsCKX10* were grouped together in the second clade and showed very low expression in all tissues. Thus, these  
132 genes were excluded from future analysis.

133 The third clade was composed of *OsCKX4*, *OsCKX5*, and *OsCKX9*. *OsCKX4*, which is generally strongly  
134 expressed in the vegetative organs, displayed extremely high expression in the roots and inflorescence. *OsCKX9*,  
135 generally expressed at low levels in all tissues, showed high expression in the leaf blade, and whole axillary buds.  
136 *OsCKX5*, usually highly expressed in all tissues, also exhibited high expression in the roots and leaves.

137 The fourth clade consisted of *OsCKX3*, *OsCKX8*, and *OsCKX11*. *OsCKX3*, which is expected to have the  
138 highest expression in the stem and young panicles, was found to have high expression in the shoot base and  
139 young panicle. *OsCKX8*, commonly expressed at lower levels than *OsCKX3* in all vegetative organs, was highly  
140 expressed in the shoot base, flag leaf primordia, and inflorescence. Furthermore, *OsCKX11*, generally expressed  
141 at a higher level than *OsCKX3* and *OsCKX8* in all tissues, specifically in the reproductive-stage root and  
142 inflorescence, displaying high expression in the root, shoot base, and young inflorescence.

143 Cytokinins have many functions during plant growth and development in different organs, and the  
144 biodegradation of cytokinins in different periods or tissues can help plants accurately regulate their growth and



145 development. In rice, we found all of eight of the *OsCKX* genes expressed at the shoot base and inflorescence  
146 meristem at different stages and positions. However, each *OsCKX* gene was expressed in a distinct pattern. As  
147 described above, certain *OsCKX* genes were highly expressed in certain organs, and we also found some tissues  
148 with certain *OsCKX* gene expressed at low levels, such as *OsCKX1* and *OsCKX3*, which were expressed at very  
149 low levels in the roots and leaves, and *OsCKX2*, *OsCKX3*, and *OsCKX11*, which were expressed at very low  
150 levels in the flag leaf primordia. Additionally, we also determined the expression patterns of *OsCKX* genes in  
151 axillary buds: *OsCKX1* was expressed in the top, *OsCKX2*, *OsCKX3*, *OsCKX4* and *OsCKX5* were expressed in  
152 the base, and *OsCKX9* was expressed throughout the buds. These distinct expression patterns stimulated our  
153 interest in their functions.

#### 154 ***OsCKX* single mutants exhibit different phenotypes**

155 RNA-Seq analysis and GUS staining assay provided a clear view of the expression levels of *OsCKXs*; however,  
156 functional characterization of these genes is still lacking. Previous studies suggested that the knockdown of  
157 specific *OsCKXs* may help improve rice production by influencing important agronomic traits, such as tillering,  
158 development of organs facilitating nutrition, and panicle phenotype. To confirm this hypothesis, we analyzed  
159 the phenotypes of nine *OsCKX* single mutants (except for *OsCKX6* and *OsCKX10*, which were  
160 expressed at very low levels during rice growth and development) created using the CRISPR/Cas9  
161 system (Supplemental Figures S1 and S2; Supplemental Table S1).

162 Since leaf size affects the photosynthetic capacity of rice, we investigated this and discovered that the top  
163 three leaves in the *osckx1*, *osckx2*, *osckx8*, and *osckx11* mutants were distinctly longer and wider compared to  
164 those of Zhonghua 11 (Supplemental Figures S3–S5; Supplemental Table S2). The *osckx9* mutant also had  
165 distinctly longer last three leaves, but there was no change in width compared to Zhonghua 11. The leaf length  
166 and width of the other mutants did not significantly change (Supplemental Figures S4, A–D, and S5). On the

167 other hand, culm diameter and plant height are closely related to the lodging resistance of rice. We found that the  
168 diameters of the basal internodes in *osckx1*, *osckx2*, *osckx8*, and *osckx11* mutants were significantly wider than  
169 those in the wild-type (WT), while the *osckx3*, *osckx4*, and *osckx5* mutants had thinner basal internodes  
170 (Supplemental Figure S4, E and F). Furthermore, the *osckx3*, *osckx4*, and *osckx5* mutants showed significantly  
171 decreased plant height compared to others (Supplemental Figure S4, G and H).

172 The panicle number is determined by the tiller number per plant and has a significant effect on rice yield.  
173 In the field and pot experiments, the *osckx4* and *osckx9* mutants developed more tillers than the WT plants,  
174 which is consistent with the results of previous studies (Supplemental Figures S3B and S4, I and J; Supplemental  
175 Tables S2 and S3). Although the mutants produced more panicles per plant, the number of grains per panicle  
176 decreased, resulting in no significant change in yield (Supplemental Figure S6, A and B; Supplemental Table S2).  
177 In contrast, the *osckx2* mutant showed significantly reduced tiller number in both the 2019 and 2020 field and  
178 pot experiments (Supplemental Tables S2 and S3). On the other hand, no significant differences were observed  
179 in the tiller numbers of the other *osckx* mutants. Additionally, there was no significant change in the yield per  
180 plant of the *osckx* mutants, except for *osckx1* and *osckx11-1*, which had significantly improved production. In  
181 contrast, *osckx3-1*, *osckx3-26*, and *osckx4-6* had significantly low yields (Supplemental Figures S6, A and B).  
182 Despite this, we observed several agronomic traits that were improved in the mutants. For example, the *osckx1*,  
183 *osckx2*, *osckx7* and *osckx8* mutants presented heavier grain weight, while the *osckx11* mutant developed more  
184 spikelets per panicle (Supplemental Figure S6, E–H).

### 185 **The *osckx1 osckx2* double mutants have significantly reduced tiller numbers**

186 Since the phenotypes of *osckx1* and *osckx2* plants weresimilar, we created the new double mutant *osckx1/2*. In  
187 the T1 generation, we obtained enough plants of the *osckx1/2-19* line, which has 1-bp insertions in *OsCKX1* and  
188 *OsCKX2* (Figure 2A; Supplemental Figure S2). The *osckx1/2-19* mutant showed significantly reduced tiller

189 number per plant (Figure 2B), consequently leading to lower panicle number per plant (Figure 2C). Notably, the  
190 *osckx1/2-19* mutants have large panicle sizes and more spikelets per panicle because the number of primary  
191 branches increased while the number of secondary branches remained the same (Figure 2, D–G). Furthermore,  
192 the 1,000-grain weight and grain length were significantly increased in *osckx1/2-19* compared with those in NIP  
193 (Figure 2H– J). In contrast, the grain width and thickness did not show significant changes between *osckx1/2-19*  
194 and NIP (Figure 2, I, K, and L). However, the total number of panicles and setting rate were lower in  
195 *osckx1/2-19* compared to those in NIP (Figure 2M), which resulted in a lower yield with no significant  
196 differences (Figure 2N). Overall, the *osckx1/2-19* plants showed better plant architecture than the WT. In  
197 *osckx1/2-19* plants, the flag leaf became wider (Figure 2, O and P) and the plants had thick basal internodes,  
198 while the plant height did not noticeably change (Figure 2, Q and R). Considered together, these observations  
199 suggest that the double knockout of *OsCKX1* and *OsCKX2* may have improved the lodging resistance and  
200 optimized plant architecture in rice.

#### 201 **Double knockout of *OsCKX4* and *OsCKX9* significantly promotes tillering**

202 Since the *osckx4* and *osckx9* single mutants developed more tillers, we created two new single mutants, namely  
203 *osckx4-6* and *osckx9-1*, and an *osckx4/9* double mutant in NIP to verify if these will also produce more tillers  
204 (Supplemental Figure S7, A and B). As expected, we discovered that the *osckx4/9* double mutant had an  
205 extremely higher tiller number compared to NIP and the two single mutants (Figure 3, A–D). In contrast, panicle  
206 size was significantly reduced in the *osckx4/9* mutant (Figure 3E). The *osckx9-1* mutant had a high panicle  
207 number per plant, but the number was markedly higher in the *osckx4/9* mutant (Figure 3F). However, the number  
208 of spikelets per panicle of *osckx4* was significantly decreased, while that of *osckx4/9* was even lower (Figure 3G).  
209 The decreased number of spikelets per panicle of *osckx4-6* was due to the low number of secondary branches per  
210 panicle, while the low number of spikelets per panicle of *osckx4/9* was caused by the reduced number of both the

---

211 primary and secondary branches (Figure 3, E, H, and I). On the other hand, seed setting rates were similar in the  
212 single and double mutants, and were significantly lower than those in WT (Figure 3J). Despite the increase in  
213 grain length, the *osckx4-6* mutant presented decreased 1,000-grain weight due to reduced grain thickness (Figure  
214 3K; Supplemental Figure S7, C–G). The 1,000-grain weight of *osckx4/9* was lower than that of the *osckx4-6*  
215 mutant due to reduced grain width and thickness (Figure 3I; Supplemental Figure S7). As a result of these  
216 changes, the yield of *osckx4/9* was significantly decreased (Figure 3L). Moreover, the root length, diameter of  
217 basal internode, plant height, and flag leaf length and width were further decreased in the double mutant  
218 compared to those in the two single mutants (Figure 3, A, M and N; Supplemental Figure S7, H–J).

219 We also conducted a hydroponic experiment to investigate the root phenotypes of the mutants (Figure 4A).  
220 We verified that *OsCKX4* and *OsCKX9* have redundant roles in regulating tillering, plant height, and root length  
221 (Figure 4 B and C). The *osckx4/9* mutant not only had shorter roots, but also fewer crown roots and smaller root  
222 diameter (Supplemental Figure S8, A and B). The length and width of the 8<sup>th</sup> leaf were also decreased in  
223 *osckx4-6* and *osckx4/9* compared to those in NIP (Figure 4, D and E). These results indicate that the reduction in  
224 the leaf size of *osckx4/9* started at the vegetative stage. Overall, these results suggest that *OsCKX4* and *OsCKX9*  
225 have a functional overlap during rice growth and development.

## 226 **RNA-seq analysis reveals the molecular functions of *OsCKX4* and *OsCKX9***

227 To elucidate the functions of *OsCKX4* and *OsCKX9*, we sampled the roots and shoot bases from NIP, *osckx4*,  
228 *osckx9*, and *osckx4/9* and performed RNA-seq analysis. Results revealed that *osckx4* had 297 differentially  
229 expressed genes (DEGs) in the shoot bases and 415 DEGs in the roots. There were 500 DEGs in the shoot bases  
230 and 342 DEGs in the roots of the *osckx9* mutant. The *osckx4/9* double mutant had the highest number of DEGs,  
231 with 806 DEGs in the shoot base and 4,556 DEGs in the roots (Figure 5A). To verify the accuracy and  
232 reproducibility of the RNA-seq results, we randomly selected seven previously studied genes associated with the

---

233 phenotypes observed in this study for quantitative reverse-transcription PCR analysis. The expression profiles of  
234 these genes were found to corroborate the RNA-seq results (Supplemental Figure S9).

235 However, although there were numerous DEGs between the WT and mutants, there were 71 DEGs in the  
236 roots and 90 DEGs in the shoot bases that overlapped between the *osckx4* vs. WT and *osckx9* vs. WT  
237 comparisons and occupied only a small fraction of the total DEGs (Figure 5B). These included some genes that  
238 regulate the absorption of silicon (*Lsi1*, *Lsi2*), zinc (*OsZIP16*), and iron (*OsIRO2*) (Fig 5C). *OsZIP9*, *OsTCP19*,  
239 *OsHKT1;1*, and *OsNPF5.5* were upregulated in the shoots of *osckx4*, while *OsLBD37*, *OsARF19*, *OsMYB61*, and  
240 *MT1a* were upregulated in the shoots of *osckx9*. In the roots, the downregulation of *OsAAP5*, *OsAAP8*, and  
241 *OsNLP6* and the upregulation of certain genes influenced the iron and phosphorus absorption in *osckx4*. We also  
242 observed the downregulation of *OsPUP1*, *OsPUP5*, *OsRR10*, and *OsNAAT4* in *osckx9*. These DEGs were also  
243 revealed to be associated with the different pathways controlled by *OsCKX4* and *OsCKX9* (Figure 5C). However,  
244 the functions of most DEGs remain unknown (Supplemental Dataset 1). The difference in the number of DEGs  
245 identified may imply that *OsCKX4* and *OsCKX9* have different functions. Moreover, 87.1% and 78.2% of DEGs  
246 in the roots and shoot bases, respectively, between the *osckx4/9* and WT were identified only in the double  
247 mutants, which may have been caused by the duplicate effect of the functional loss of *OsCKX4* and *OsCKX9*  
248 (Figure 5B).

249 Since we observed that *osckx4/9* exhibited more severe phenotypes and possessed more DEGs, we analyzed  
250 the DEGs identified in the roots and shoot bases between the WT and *osckx4/9* plants by using Kyoto  
251 Encyclopedia of Genes and Genomes (KEGG) enrichment analysis (Figure 5D). In both tissues, the top enriched  
252 KEGG pathways included ‘glycolysis/gluconeogenesis,’ ‘biosynthesis of amino acids,’ and those related  
253 to carbon and nitrogen metabolism. Since most of the DEGs were not functionally annotated, the relationship  
254 between the DEGs and the enriched pathways and their influence on the growth and development of the mutant

255 plants were not fully understood. However, we identified several genes that may be associated with the  
256 phenotypes observed in this study.

### 257 ***OsCKX4* and *OsCKX9* regulate the metabolism and transport of hormones**

258 First, we identified genes related to gibberellin metabolism. We found that the expression of *OsKS1* and *OsKS2*  
259 was significantly downregulated in the roots of *osckx4/9* (Figure 6A; Supplemental Dataset 1). *OsKS1* and  
260 *OsKS2* are enzymes involved in gibberellin biosynthesis. The expression of *OsKS2* was downregulated in the  
261 roots of the *osckx9* mutant, while no changes were observed in the *osckx4* mutant. Other genes for GA  
262 biosynthesis and degradation, such as *GA20ox* and *GA2ox*, were markedly downregulated in the roots of the  
263 *osckx4/9* mutant. Some GA receptors were also downregulated in the roots of the *osckx4/9* mutant. The changes  
264 in the expression of gibberellin-related genes may explain the significantly reduced plant height of *osckx4/9*  
265 double mutants.

266 Further, we examined the genes associated with SLs to investigate the cause of the increased tiller numbers  
267 in the single and double mutants. We discovered that *OsDI7* was downregulated 1.20-fold, which was not  
268 significant in the roots of *osckx4/9* (Figure 6B; Supplemental Dataset 1), this may have been the cause of the  
269 increased tiller number and another reason for reduced plant height of *osckx4/9*. However *OsDI0* was  
270 upregulated 1.59-fold in the shoot base of *osckx4/9*, and *OsDI7* was upregulated 1.38-fold in the shoot base of  
271 *osckx9*, neither of which reflect significant differences. This may have been caused by feedback regulation (Arite  
272 et al., 2007). Furthermore, the SL-related transcription factors *OsTBI* and *OsMADS57* were upregulated  
273 1.28-fold and 1.03-fold, respectively, in the shoot bases of *osckx4*, neither of which were significant changes.  
274 Finally, *OsTBI* and *OsMADS57* were downregulated 1.71-fold and 2.29-fold in the roots of *osckx4/9*, and  
275 *OsMADS57* was downregulated 1.24-fold in the roots of *osckx9*, but their functions in roots remain unknown.

276 Additionally, investigation of several differentially expressed auxin-related genes revealed that auxin efflux

---

277 transporters *OsPIN2* and *OsPIN8* were upregulated in the shoot bases and the roots, respectively, of the mutants.  
278 We found that the auxin primary response genes *OsGH3-1*, *OsGH3-2*, *OsIAA9*, and *OsSAUR12* were  
279 upregulated in the shoot bases of the *osckx4/9* and single mutants. Additionally, *OsGH3-2*, nine *OsIAA* genes  
280 (*OsIAA1*, 4, 9, 12, 14, 15, 19, 23, 24), and five *OsSAUR* genes (*OsSAUR6*, 20, 27, 28, 33) were downregulated in  
281 the roots of *osckx4/9*; however, *OsIAA16* was upregulated in the roots of *osckx4/9*.

282 Furthermore, the functional loss of *OsCKX4* and *OsCKX9* also affected the expression of genes associated  
283 with cytokinin metabolism and signal transduction. The cytokinin-related genes *OsCKX2*, *OsCKX5*, *OsRR4*,  
284 *OsRR6*, *OsRR7*, *OsRR9*, and *OsRR10* were downregulated in the roots of *osckx4/9*, while *OsCRL4* was  
285 upregulated in the shoot bases of *osckx4/9* (Supplemental Dataset 1). These results may have been caused by the  
286 high cytokinin contents in the double mutants.

#### 287 ***OsCKX4* and *OsCKX9* are associated with nitrogen absorption**

288 Many genes related to nitrogen absorption and assimilation, such as *OsNRT1*, *OsNRT2.2*, *OsNRT2.3*,  
289 *OsAMT1.3*, *OsNAR2.1*, and *OsNIR2*, were also discovered to be significantly upregulated in the roots of the  
290 *osckx4/9* mutant (Figure 7; Supplemental Dataset 1). In contrast, we observed the downregulation of *OsGSI;3* in  
291 the roots and that of *OsASI* in the shoot bases of *osckx4/9*. Most of the genes related to nitrogen absorption and  
292 assimilation also showed similar trends in *osckx4*, while some did not show significant differences compared to  
293 NIP. However, *OsAMT3.2* and *OsGSI;3* were upregulated in the shoot bases of *osckx9*. The changes in the  
294 expression of these genes were significantly different from those of the *osckx4/9* double mutants. Several nitrate  
295 and peptide transporter (*OsNPF*) family genes were also found to be differentially expressed.

296

## 297 **DISCUSSION**

### 298 **Functional differences and redundancy between *OsCKX* genes**

299 To systematically determine the functions of *OsCKX* genes, we analyzed their expression patterns and  
300 investigated the phenotypes of *osckx* single and double mutants. Our study revealed the roles of most *OsCKX*  
301 genes in the growth and development of rice. After two years of field experiments, we discovered that *osckx4*  
302 and *osckx9* developed more tillers at the vegetative stage, while *osckx2* had fewer tillers. At the reproductive  
303 stage, the top three leaves were longer and wider and the basal internodes were thicker in *osckx1*, *osckx2*, *osckx8*,  
304 and *osckx11* (Zhonghua11 [ZH11] background), while wider flag leaves and thicker basal internodes were  
305 observed in *osckx1/2* (NIP background) (Figure 8). The *osckx9*, *osckx3*, *osckx4*, and *osckx5* mutants showed little  
306 changes in flag leaf length and width compared to their background, while *osckx3*, *osckx4*, and *osckx5* developed  
307 thinner basal internodes. For yield-related phenotypes, *osckx9* developed more panicles while *osckx9* and *osckx4*  
308 had fewer spikelets per panicle. Moreover, *osckx1*, *osckx2*, and *osckx8* displayed increased 1,000-grain weight,  
309 while *osckx11* showed reduced 1,000-grain weight.

310 Previous studies have described the functions of *OsCKX2*, *OsCKX4*, *OsCKX9*, and *OsCKX11*. First,  
311 researchers elucidated the function of *OsCKX2* after observing that null mutants or plants with downregulation  
312 of *OsCKX2* developed more spikelets per panicle (Ashikari et al., 2005), more tillers, and larger grains (Yeh et  
313 al., 2015). In the present study, we observed very little increase in the number of spikelets per panicle during the  
314 two-year field experiment, with the observed increase being lower than that observed by the other researchers.  
315 However, we found that the *osckx2* mutant of ZH11 showed significantly reduced tiller number within the first  
316 year of the field experiment. Another mutant, *osckx1/2* of NIP, also showed reduced tiller number, which  
317 supports the hypothesis that fewer tillers may be related to thicker culms. Furthermore, both the *osckx2* mutant of  
318 ZH and *osckx1/2* mutant of NIP presented increased 1,000-grain weight. The discrepancies between our results



319 and previous findings regarding panicle size may be attributed to the different cultivated varieties or  
320 environmental impact.

321 Furthermore, previous reports stated that *OsCKX4* overexpression can cause the development of a larger  
322 root system, but result in shorter plant height, fewer tillers, and smaller panicles (Gao et al., 2014). For example,  
323 *OsCKX4-RNAi* or *osckx4* mutants showed fewer crown roots and shorter root lengths (Gao et al., 2014; Mao et  
324 al., 2020). Since *OsCKX4* is commonly expressed in the root, previous studies were more focused on  
325 investigating the relationships between *OsCKX4* and the root system instead of the shoot system. Here, we  
326 discovered that *osckx4* mutants produced more tillers, especially at the early stages, but has fewer spikelets per  
327 panicle. Additionally, *osckx9* mutants have been reported to develop more tillers, fewer spikelets per panicle, and  
328 shorter plant height (Duan et al., 2019). Since the null mutations of *OsCKX4* and *OsCKX9* can affect the tiller  
329 number, we constructed *osckx4/9* mutants, which distinctly showed more tillers, shorter plant height, and smaller  
330 panicles. The increase in the tiller number of *osckx4/9* double mutants was greater than those observed in *osckx4*  
331 and *osckx9* single mutants. Furthermore, the decrease in plant height and number of spikelets per panicle of  
332 *osckx4/9* double mutants was also higher than those observed in *osckx4* and *osckx9* single mutants. These results  
333 suggest the partial functional overlap of *OsCKX4* and *OsCKX9* during rice growth and development. Moreover,  
334 *osckx11* mutants previously displayed more tillers, larger panicles, and lighter 1,000-grain weight (Zhang et al.,  
335 2020); these were also observed in our study. In general, we found that each *OsCKX* gene had its own function  
336 during rice growth and development as well as their own distinct characteristics, and each *osckx* single or double  
337 mutant had a distinct phenotype.

### 338 **Potential causes of the functional differences and redundancy in *OsCKX* genes**

339 The main function of CKX enzymes is the biodegradation of cytokinins. Previous studies have reported that  
340 CKXs catalyze different kinds of cytokinins. In maize, the ZmCKX enzyme activity has been systematically

---

341 analyzed, revealing that ZmCKX1 and ZmCKX12 specially targeted iP, tZ, and *cis*-zeatin (*cZ*). Furthermore,  
342 ZmCKX5 was partial to iP and isopentenyladenosine 5'-monophosphate, while ZmCKX2, ZmCKX3, ZmCKX4a,  
343 and ZmCKX4b preferred the biodegradation of iP-9-glucoside (iP9G) and *cZ*. Finally, ZmCKX8, ZmCKX9, and  
344 ZmCKX10 showed preference for tZ and *cZ* (Zalabak et al., 2014). In *Arabidopsis*, AtCKX1 showed the highest  
345 preference for tZ phosphates, iP phosphates, and iP9G, while AtCKX3 preferred iP phosphates and iPR, and  
346 AtCKX7 preferred iP9G and tZ (Kowalska et al., 2010). However, little is known about the preference of  
347 OsCKX enzymes, except OsCKX9 that is partial to tZ and OsCKX11 that specially targets tZ and *cZ* (Duan et  
348 al., 2019; Zhang et al., 2020). OsCKX11 has the same substrate as its homolog protein, ZmCKX10, while other  
349 OsCKX enzyme substrates may need to be inferred from endogenous hormone content data. Therefore, the  
350 distinctive functions of OsCKXs may be caused by their different target substrates.

351 CKX proteins are mainly localized in the ER because most contain an N-terminal signal peptide sequence  
352 (Zalabak et al., 2016; Niemann et al., 2018). In the ER, cytokinins combine with their receptors and initiate  
353 signaling transduction, while most ER-localized CKXs regulate cytokinin concentrations to precisely adjust  
354 cytokinin signals (Niemann et al., 2018; Romanov and Schmulling, 2021). Previous studies revealed that  
355 OsCKX4 and OsCKX11 are localized in the cytosol, while OsCKX9 is localized in the cytosol and nuclei (Gao  
356 et al., 2014; Duan et al., 2019; Zhang et al., 2020). These three CKXs potentially regulate the cytokinin balance  
357 in other cellular organelles. However, the locations of the remaining OsCKXs remain unknown. Hence, we  
358 hypothesize that the subcellular localization of OsCKXs may also influence their functional differentiation.

359 In this study, the *OsCKX* genes exhibited different expression patterns. For example, *OsCKX1* and *OsCKX2*  
360 were expressed in the inflorescences and grains, while *OsCKX4* was highly expressed in the roots. In summary,  
361 the differences in the nature of catalytic substrates, subcellular localization, and expression in tissues may  
362 contribute to the different functions observed in *OsCKX* family genes.

### 363 **Significantly altered transcriptome of the *osckx4 osckx9* mutant**

364 Although *OsCKX4* and *OsCKX9* have been extensively studied, we observed new phenotypes in the single  
365 mutants, which have not been reported previously. Interestingly, these two genes were found to exhibit redundant  
366 functions during rice growth and development. Hence, we first investigated the genes associated with plant  
367 height and then identified the DEGs related to gibberellin metabolism between the NIP and mutants. *OsKSI* and  
368 *OsKS2*, which encode enzymes that catalyze the second step of the GA biosynthesis pathway (Ji et al., 2014;  
369 Tezuka et al., 2015), were significantly downregulated in the roots of *osckx4/9*. On the other hand, possibly due  
370 to the limited substrate, the expression of several *GA20ox* and *GA2ox* genes for gibberellin biosynthesis and  
371 biodegradation, respectively, were downregulated in *osckx4/9*. We hypothesize that the disrupted biosynthesis of  
372 gibberellin may have caused the reduction in *osckx4/9* plant height. However, the mechanism by which *OsCKX4*  
373 and *OsCKX9* regulate the expression of *OsKSI* and *OsKS2* is unknown.

374 Since the double mutants exhibited semi-dwarf phenotypes with more tillers, we believed that the  
375 expression of SL-related genes may have changed in the double mutants. However, we did not observe any  
376 changes in the expression of SL-signaling genes but found that *OsD17* was downregulated in the roots of  
377 *osckx4/9* mutants. This contradicts a previous report that stated *d17* mutants developed dwarf plants and more  
378 tillers (Zou et al., 2005). On the other hand, the SL-related transcript factors *OsTBI* and *OsMADS57* were only  
379 downregulated in the roots. Furthermore, *OsTBI* was upregulated in the shoot bases of *osckx4*. Previous studies  
380 on *tb1* mutants and *OsMADS57* overexpression showed that these plants developed more tillers than the WT  
381 (Takeda et al., 2003; Guo et al., 2013). Since SL directly activates *OsCKX9* to regulate shoot architecture in rice,  
382 we also determined whether *OsCKX4* and *OsCKX9* can regulate the tiller number phenotype through the SL  
383 pathway by analyzing the expression of SL-related genes between WT and mutants. Based on these findings,  
384 cytokinin may be located downstream of the SL pathway during rice tillering. During the outgrowth of tiller buds,

---

385 the auxin at the tip of the axillary bud is transported by auxin efflux carriers. In *Arabidopsis*, cytokinin response  
386 factors regulate *PIN* expression (Simaskova et al., 2015; Waldie and Leyser, 2018). Here, we found that *OsPIN2*  
387 was upregulated in the shoot bases of *osckx4* and *osckx4/9*. In rice, *OsPIN2* transports auxins from the shoot to  
388 the root–shoot junction, and overexpression of *OsPIN2* results in the increased number of tillers (Chen et al.,  
389 2012). However, further research is needed to determine which cytokinin response factor regulates *OsPIN2*.

390 We also found that several type-A transcription factors, including *OsRR4*, *OsRR6*, *OsRR7*, *OsRR9*, and  
391 *OsRR10*, showed lower expression in the roots of *osckx4/9*. Some were downregulated in single mutants.  
392 However, these results were contradictory, since type-A RR genes are primary response genes for cytokinin  
393 signaling, while *OsRR4*, *OsRR9*, and *OsRR10* were previously found to be upregulated in  
394 *OsCKX4*-overexpression lines (Gao et al., 2014). Since *OsRR4*, *OsRR9*, and *OsRR10* share similar amino acid  
395 sequences (Tsai et al., 2012; Wang et al., 2019) and *osrr9 osrr10* mutant lines developed fewer spikelets per  
396 panicle and higher tolerance to saline stress, we hypothesized that *OsRR4*, *OsRR9*, and *OsRR10* may have  
397 important functions during the cytokinin-induced inhibition of root growth. In the present study, we observed the  
398 downregulation of *OsWOX11* (Zhao et al., 2009) and *OsMADS25* (Yu et al., 2015) in the roots of *osckx4* and  
399 *osckx4/9*, which may explain why *osckx4* and *osckx4/9* plants have smaller root systems. Furthermore, we  
400 discovered that *OsCKX4* and *OsCKX9* influence several genes related to nitrogen absorption and utilization,  
401 providing new potential targets for improving nitrogen usage efficiency in rice. However, the mechanisms  
402 underlying this process are unknown; hence, further research is still required.

403 Interestingly, in addition to the genes regulated by both *OsCKX4* and *OsCKX9*, we also identified several  
404 genes that are regulated by *OsCKX4* and *OsCKX9* individually. In summary, the similar amino acid sequences  
405 but different expression patterns of *OsCKX4* and *OsCKX9* enable them to functionally overlap in the regulation  
406 of some pathways, while also individually regulating specific pathways.

407

408 **CONCLUSION**

409 Our systematic analysis of 11 genes in the *OsCKX* family reveals their complex expression patterns in rice. A  
410 total of nine *OsCKX* mutants were produced using CRISPR/Cas9 technology. By examining the phenotypes of  
411 the mutants throughout the rice growth period, we determined the functions of specific *OsCKX* genes in plant  
412 development. In specific, we discovered that *OsCKX4* and *OsCKX9* inhibited tillering, while *OsCKX1* and  
413 *OsCKX2* promoted tillering. Considered together, our findings establish a community resource for fully  
414 elucidating the function of *OsCKXs*, providing new insights that may be used for future studies to improve rice  
415 yield and initiate green production.

416

---

## 417 MATERIALS AND METHODS

### 418 Plant materials and growth conditions

419 *Oryza sativa* L. ssp. *japonica* (cultivars: NIP and ZH11) was the WT rice material chosen for this  
420 study. The mutants were comprised *osckx1/2*, *osckx3*, *osckx4*, *osckx5*, *osckx9*, and *osckx4/9* from NIP  
421 and *osckx1*, *osckx2*, *osckx7*, *osckx8*, *osckx9*, and *osckx11* from ZH11. The target for *osckx1/2* matches  
422 *OsCKX1* and *OsCKX2* completely, and has a 1-bp mismatch for *OsCKX11*. The sequencing results  
423 showed that the *osckx1/2-19* line had a 1-bp insertion in *OsCKX1* and *OsCKX2*, but no change was  
424 observed in *OsCKX11* (Supplemental Figure S2).

425 The rice plants were grown in a field in Danyang, Jiangsu Province, China (31.907° N 119.466°  
426 E). We used 300 kg/hm<sup>2</sup> nitrogen, 150 kg/hm<sup>2</sup> P<sub>2</sub>O<sub>5</sub>, and 240 kg/hm<sup>2</sup> K<sub>2</sub>O as base fertilizers for the  
427 field experiment. For the pot experiment, in each pot, 4.28 g urea was added, while 1.92 g KH<sub>2</sub>PO<sub>4</sub>  
428 and 1.49 g KCl were used during the whole growth period. For the hydroponic experiment, the nutrient  
429 solution was composed of 2 mM KNO<sub>3</sub>, 2 mM NH<sub>4</sub>Cl, 0.32 mM NaH<sub>2</sub>PO<sub>4</sub>·2H<sub>2</sub>O, 0.011 mM MnCl<sub>2</sub>·4H<sub>2</sub>O,  
430 0.0185 mM H<sub>3</sub>BO<sub>3</sub>, 0.0006 mM Na<sub>2</sub>MoO<sub>4</sub>·2H<sub>2</sub>O, 0.0014 mM ZnSO<sub>4</sub>·7H<sub>2</sub>O, 0.0016 mM CuSO<sub>4</sub>·5H<sub>2</sub>O, 0.3 mM  
431 MgCl<sub>2</sub>·6H<sub>2</sub>O, 0.66 mM CaCl<sub>2</sub>, and 0.0448 mM Fe(II)-EDTA (pH = 5.5–6). The plants were grown in climate  
432 chambers under long-day conditions (15 h light at 28 °C and 9 h dark at 24 °C) with a relative humidity of ~70%  
433 and treated for 20 days.

### 434 Plasmid construction for genetic transformation

435 To construct the mutants for research by using CRISPR/Cas9 technology, as previously described, each *OsCKX*  
436 gene was assigned one to two single guide RNA oligo targets by using CRISPR/Cas9 technology as previously  
437 described (Mao et al., 2013). The primers used for vector construction and genotyping are shown in  
438 Supplemental Table S1.

439 To construct *pOsCKX::GUS*, An upstream fragment of the *OsCKX*-encoding region (>3 kb) was amplified  
440 by PCR, and the resulting amplicon was excised with the corresponding restriction endonuclease and ligated into  
441 the *pCAMBIA1300::GUS* vector (Wang et al., 2020).

#### 442 **Analysis of GUS activity**

443 The GUS reporter activity was assayed by histochemical staining using GUS Staining Kit (FCNCS,  
444 <https://www.fcncs.com>). Various tissues were collected from *pOsCKX::GUS* transgenic plants at each  
445 developmental stage. After dipping in the GUS staining solution, the samples were taken out and then incubated  
446 in the staining solution for 6–48 h at 37 °C in the dark. The samples were destained thrice with 70% ethanol in a  
447 water bath for 5 min. Images were taken using SZX16 microscope (Olympus, Tokyo, Japan;  
448 <https://www.olympus-lifescience.com/en/>).

#### 449 **Sampling, RNA extraction and gene expression analysis**

450 We collected roots from 2 cm under the tip and shoot bases (~5-mm segments from the first nodes)  
451 containing the SAMs, axillary buds, young leaves, and tiller nodes from WT, *osckx4*, *osckx9*, and  
452 *osckx4/9* plants. The samples were stored at –80 °C until further use.

453 Total RNA was extracted using E.Z.N.A.<sup>®</sup> Plant RNA Kit (Omega Bio-tek Inc., Norcross, GA, USA;  
454 <https://www.omegabiotek.com/>) and subjected to reverse-transcription using PrimeScript<sup>™</sup> RT Reagent Kit  
455 (Takara Biotechnology, Tokyo, Japan). Quantitative reverse-transcription PCR was performed on ABI PRISM  
456 7300 Real-Time PCR System (Applied Biosystems, Thermo Fisher Scientific, Waltham, MA, USA;  
457 <https://www.thermofisher.com/>) with SYBR<sup>®</sup> Premix Ex Taq<sup>™</sup> (Takara), following the manufacturer's  
458 instructions. Relative expression analysis was performed using the actin gene as internal control. The primers  
459 used are listed in Supplemental Table S1.

#### 460 **Sequence alignment and phylogenetic analysis**

461 The amino acid sequence alignment was performed using MUSCLE (Madeira et al., 2019), and phylogenetic  
462 trees were generated using neighbor-joining method and 1,000 bootstrap iterations in MEGA X (Kumar et al.,  
463 2018).

#### 464 **RNA-Seq and data analysis**

465 Before library preparation, oligo(dT)-attached magnetic beads (Invitrogen, Cat. No. 61006) were used  
466 to purify the mRNA. MGIEasy RNA Library preparation kit was used for library construction from  
467 purified mRNA according to the manufacturer's instruction (BGI, Cat. No. 1000006383). The quality  
468 of the constructed library is checked and sequenced after passing. High-throughput sequencing was  
469 paired-end sequenced on the BGISEQ-500 platform (BGI-Shenzhen, China). The obtained reads were  
470 processed and analyzed, and genes with  $Q$  values  $< 0.05$  and fold change values  $> 1$  were considered  
471 significantly differentially expressed. Based on the list of DEGs, we created and modified Venn  
472 diagrams in Microsoft Excel. Furthermore, we performed KEGG enrichment analysis ( $Q < 0.05$ )  
473 (Kanehisa, 2019), and generated a bubble chart using R.

474

#### 475 **ACCESSION NUMBERS**

476 Sequence data from this article can be found in Rice Annotation Project database under the following accession  
477 numbers: *Actin* (Os03g0718100), *OsCKX1* (Os01g0187600), *OsCKX2* (Os01g0197700), *OsCKX3*  
478 (Os10g0483500), *OsCKX4* (Os01g0940000), *OsCKX5* (Os01g0775400), *OsCKX7* (Os02g0220100), *OsCKX8*  
479 (Os04g0523500), *OsCKX9* (Os05g0374200), *OsCKX11* (Os08g0460600), *OsMADS25* (Os04g0304400),  
480 *OsMADS57* (Os02g0731200), *OsD17* (Os04g0550600), *OsPIN2* (Os06g0660200), *OsWOX11* (Os07g0684900),  
481 *OsRR4* (Os01g0952500), *OsTBI* (Os03g0706500).

#### 482 **Supplemental data**



483 The following supplemental materials are available.

484 **Supplemental Figure S1.** Gene structures and mutation details of *OsCKXs*.

485 **Supplemental Figure S2.** Chromatograms of the *osckx* mutant lines.

486 **Supplemental Figure S3.** The *osckx* mutants of Zhonghua11 from the 2020 field experiment.

487 **Supplemental Figure S4.** Phenotypic characterization of the vegetative organs in *osckx* mutants from the 2020  
488 field experiment.

489 **Supplemental Figure S5.** Phenotypic characterization of the second and third top leaves in *osckx* mutants from  
490 the 2020 field experiment.

491 **Supplemental Figure S6.** Phenotypic characterization of yield-related phenotypes in *osckx* mutants from the  
492 2020 field experiment.

493 **Supplemental Figure S7.** Mutation details of *OsCKX9*, chromatograms of the *osckx9* and *osckx4/9* mutant lines,  
494 and phenotypic characterization of the flag leaves and seeds in wild-type, *osckx4*, *osckx9*, and *osckx4/9* plants.

495 **Supplemental Figure S8.** Phenotypic characterization of the leaf and root systems in wild-type and *osckx4/9*  
496 plants.

497 **Supplemental Figure S9.** Relative expression levels and FPKM values of *D17*, *RR4*, *WOX11*, *PIN2*, *TB1*,  
498 *OsMADS25*, and *OsMADS57* in the roots and shoot bases (BP) of Nipponbare (NIP), *osckx4*, *osckx9*, and  
499 *osckx4/9*.

500 **Supplemental Table S1.** Information of primers used in the study.

501 **Supplemental Table S2.** Characterization of the vegetative organs and yield-related phenotypes in *osckx*  
502 mutants from the 2019 field experiment.

503 **Supplemental Table S3.** Tiller numbers in *osckx* mutants from the 2019 field experiment.

504 **Supplemental Dataset 1.** RNA sequencing data.

---

505 **Acknowledgments**

506 We thank Jiankang Zhu and Caixia Gao for providing the vectors of the CRISPR-Cas9 system. We also thank  
507 Biogle and Biorun genome editing center for producing transgenic rice.

508 **FIGURE LEGENDS**

509 **Figure 1.** Genetic relationship and expression patterns of *OsCKX* genes based on RNA sequencing  
510 data and GUS staining assay. A, Genetic relationship and expression patterns of *OsCKX* genes  
511 investigated in the leaf blade at the vegetative stage (LBV), leaf sheath at the vegetative stage (LSV),  
512 root at the vegetative stage (RV), leaf blade at the reproductive stage (LBR), leaf sheath at the  
513 reproductive stage (LSR), root at the reproductive stage (RR), stem (S), inflorescence meristem (IM),  
514 flower (F), and grain (G). The expression pattern was based on log<sub>2</sub> Fragments Per Kilobase of exon  
515 model per Million mapped fragments (FPKM) values. B, Histochemical GUS staining of *pOsCKX::GUS*  
516 transgenic plants at various developmental stages. The scale bar in B was 1 mm.

517

518 **Figure 2.** Genetic and phenotypic characterization between wild-type (WT) and *osckx1/2-19* mutant  
519 plants. A, Mutation details of the coding sequences in the *OsCKX1* and *OsCKX2* of *osckx1/2-19*  
520 mutant. Both *OsCKX1* and *OsCKX2* had functional loss due to the 1-bp insertion caused by frameshift  
521 mutation. The solid yellow, blue, and red boxes represent the exons, untranslated regions, and target  
522 sequences, respectively. The introns are shown as solid lines, while protospacer adjacent motif (PAM)  
523 sequences are shown in red color and underlined with red. B, Number of tillers at the vegetative stage  
524 70 days after sowing. C, Panicles at the reproductive stage (n = 20 for Nipponbare [NIP], n = 10 for  
525 *osckx1/2-19*). D, Panicle phenotypes of NIP and *osckx1/2* plants. The image was digitally extracted  
526 and scaled for comparison (scale bar = 10 cm). E–H, Measurement of the spikelets per panicle (E),

---

527 primary branches per panicle (F), secondary branches per panicle (G), 1,000-grain weight (H) ( $n > 20$   
528 for E–G,  $n = 5$  for H) and *osckx1/2-19* ( $n > 10$  for E–G,  $n = 5$  for H) plants. I, Grain phenotypes of NIP  
529 and *osckx1/2* plants. The image was digitally extracted and scaled for comparison (scale bar = 1 cm).  
530 J–R, Measurement of the grain length (J), grain weight (K), and grain thickness (L), seed setting rate  
531 (M), yield per plant (N), length of flag leaves (O), width of flag leaves (P), basal internode diameter  
532 (Q), and plant height (R) of NIP ( $n > 50$  for J–L,  $n > 20$  for M–Q) and *osckx1/2-19* ( $n > 50$  for J–L,  $n >$   
533  $10$  for M–Q) plants. The P-values indicate the significant differences between NIP and *osckx1/2-19*  
534 determined by Student's *t*-test.

535

536 **Figure 3.** Phenotypic characterization between wild-type (WT) and *osckx4*, *osckx9*, and *osckx4/9* mutant plants  
537 from the field experiment. A, Phenotypic features of Nipponbare (NIP), *osckx4*, *osckx9* and *osckx4/9* seedlings at  
538 the vegetative stage 46 days after sowing. The image was digitally extracted and scaled for comparison (scale  
539 bar = 10 cm). B–C, Number of tillers at the vegetative stage 46 days after sowing (B) and reproductive stage 70  
540 days after sowing (C) ( $n > 20$  for NIP, *osckx4-6*, and *osckx9-1*,  $n = 10$  for *osckx4/9*). D–E, Habits (D) and panicle  
541 phenotypes (E) of NIP, *osckx4-6*, *osckx9-1*, and *osckx4/9* plants at the mature stage. The image was digitally  
542 extracted and scaled for comparison (scale bar = 10 cm). F–N, Measurement of the panicle number (F), spikelets  
543 per panicle (G), seed setting rate (H), 1,000-grain weight (I), yield per plant (J), plant height (K), primary  
544 branches per panicle (L), secondary branches per panicle (M), and diameter of basal internode of NIP (N),  
545 *osckx4-6*, *osckx9-1* ( $n > 20$  for F–H and J–N,  $n = 5$  for I), and *osckx4/9* ( $n > 10$  for F–H and J–N,  $n = 5$  for I).  
546 Different capital letters represent significant differences ( $P < 0.01$ ) determined by one-way ANOVA and shortest  
547 significant ranges (SSR) test.

548

---

549 **Figure 4.** Phenotypic characterization between wild-type (WT) and *osckx4*, *osckx9*, and *osckx4/9* mutant plants  
550 from the hydroponic experiment. A, Phenotypic features of Nipponbare (NIP), *osckx4*, *osckx9*, and *osckx4/9*  
551 seedlings 21 days after transferring to hydroponic solutions. The image was digitally extracted and scaled for  
552 comparison (scale bar = 10 cm). B–E, Measurement of the shoot and root lengths (B), tiller numbers (C), length  
553 of 8<sup>th</sup> leaf (D), and width of 8<sup>th</sup> leaf (E) of NIP, *osckx4-6*, *osckx9-1*, and *osckx4/9* seedlings (n = 24 each).  
554 Different capital letters represent significant differences ( $P < 0.01$ ) determined by one-way ANOVA and SSR  
555 test.

556  
557 **Figure 5.** RNA-seq analysis of the roots and shoot bases (BP) between wild-type (WT) and *osckx4*, *osckx9*, and  
558 *osckx4/9* mutant plants. A, The number of differentially expressed genes (DEGs) identified in the roots and shoot  
559 bases of the following pairwise comparisons: Nipponbare (NIP) vs. *osckx4*, NIP vs. *osckx9*, and NIP vs. *osckx4/9*.  
560 The changes in gene expression levels were calculated using the log<sub>2</sub> fold change and  $Q$  values from three  
561 biological replicates. B, Overlapping DEGs in the roots and shoot bases (BP) of NIP vs. *osckx4*, NIP vs. *osckx9*,  
562 and NIP vs. *osckx4/9*. C, DEGs in *osckx4* and *osckx9* specifically and in common in the roots and shoots, genes in  
563 magenta are upregulated; genes in sky blue are downregulated. D, Top enriched Kyoto Encyclopedia of Genes  
564 and Genomes (KEGG) pathways of the DEGs identified in the roots and shoot bases of NIP vs. *osckx4/9*.

565  
566 **Figure 6.** *OsCKX4* and *OsCKX9* are associated with several signal transduction pathways. A, Differentially  
567 expressed genes (DEGs) related to gibberellin metabolism and signaling transduction. B, DEGs related to  
568 strigolactone biosynthesis and signaling transduction. \*  $Q < 0.05$ , \*\*  $Q < 0.01$ .

569  
570 **Figure 7.** *OsCKX4* and *OsCKX9* associated with nitrogen absorption. Differentially expressed

571 genes related to nitrogen absorption, metabolism, and transportation. \*  $Q < 0.05$ , \*\*  $Q < 0.01$ .

572

573 **Figure 8. Patterns of *OsCKX* genes in rice.**

---

574 **Literature Cited**

- 575 Arite T, Iwata H, Ohshima K, Maekawa M, Nakajima M, Kojima M, Sakakibara H, Kyojuka J (2007)  
576 DWARF10, an RMS1/MAX4/DAD1 ortholog, controls lateral bud outgrowth in rice. *Plant J* 51:  
577 1019-1029
- 578 Ashikari M, Sakakibara H, Lin S, Yamamoto T, Takashi T, Nishimura A, Angeles ER, Qian Q, Kitano H,  
579 Matsuoka M (2005) Cytokinin oxidase regulates rice grain production. *Science* 309: 741-745
- 580 Bartrina I, Otto E, Strnad M, Werner T, Schmulling T (2011) Cytokinin regulates the activity of reproductive  
581 meristems, flower organ size, ovule formation, and thus seed yield in *Arabidopsis thaliana*. *Plant Cell*  
582 23: 69-80
- 583 Chen L, Zhao J, Song J, Jameson PE (2020) Cytokinin dehydrogenase: a genetic target for yield improvement in  
584 wheat. *Plant Biotechnol J* 18: 614-630
- 585 Chen Y, Fan X, Song W, Zhang Y, Xu G (2012) Over-expression of OsPIN2 leads to increased tiller numbers,  
586 angle and shorter plant height through suppression of OsLAZY1. *Plant Biotechnol J* 10: 139-149
- 587 Ding C, You J, Chen L, Wang S, Ding Y (2014) Nitrogen fertilizer increases spikelet number per panicle by  
588 enhancing cytokinin synthesis in rice. *Plant Cell Rep* 33: 363-371
- 589 Duan J, Yu H, Yuan K, Liao Z, Meng X, Jing Y, Liu G, Chu J, Li J (2019) Strigolactone promotes cytokinin  
590 degradation through transcriptional activation of CYTOKININ OXIDASE/DEHYDROGENASE 9 in  
591 rice. *Proc Natl Acad Sci U S A* 116: 14319-14324
- 592 Gao S, Fang J, Xu F, Wang W, Sun X, Chu J, Cai B, Feng Y, Chu C (2014) CYTOKININ  
593 OXIDASE/DEHYDROGENASE4 Integrates Cytokinin and Auxin Signaling to Control Rice Crown  
594 Root Formation. *Plant Physiol* 165: 1035-1046
- 595 Gao S, Xiao Y, Xu F, Gao X, Cao S, Zhang F, Wang G, Sanders D, Chu C (2019) Cytokinin-dependent  
596 regulatory module underlies the maintenance of zinc nutrition in rice. *New Phytol* 224: 202-215
- 597 Guo S, Xu Y, Liu H, Mao Z, Zhang C, Ma Y, Zhang Q, Meng Z, Chong K (2013) The interaction between  
598 OsMADS57 and OsTB1 modulates rice tillering via DWARF14. *Nat Commun* 4: 1566
- 599 Jameson PE, Song J (2020) Will cytokinins underpin the second 'Green Revolution'? *J Exp Bot* 71: 6872-6875
- 600 Ji SH, Gururani MA, Lee JW, Ahn BO, Chun SC (2014) Isolation and characterisation of a dwarf rice mutant  
601 exhibiting defective gibberellins biosynthesis. *Plant Biol (Stuttg)* 16: 428-439
- 602 Joshi R, Sahoo KK, Tripathi AK, Kumar R, Gupta BK, Pareek A, Singla-Pareek SL (2018) Knockdown of an  
603 inflorescence meristem-specific cytokinin oxidase - OsCKX2 in rice reduces yield penalty under  
604 salinity stress condition. *Plant Cell Environ* 41: 936-946
- 605 Kanehisa M (2019) Toward understanding the origin and evolution of cellular organisms. *Protein Science* 28:  
606 1947-1951
- 607 Kollmer I, Novak O, Strnad M, Schmulling T, Werner T (2014) Overexpression of the cytosolic cytokinin  
608 oxidase/dehydrogenase (CKX7) from *Arabidopsis* causes specific changes in root growth and xylem  
609 differentiation. *Plant J* 78: 359-371
- 610 Kowalska M, Galuszka P, Frebortova J, Sebel M, Beres T, Hluska T, Smehilova M, Bilyeu KD, Frebort I (2010)  
611 Vacuolar and cytosolic cytokinin dehydrogenases of *Arabidopsis thaliana*: heterologous expression,  
612 purification and properties. *Phytochemistry* 71: 1970-1978
- 613 Kudo T, Makita N, Kojima M, Tokunaga H, Sakakibara H (2012) Cytokinin activity of cis-zeatin and phenotypic  
614 alterations induced by overexpression of putative cis-Zeatin-O-glucosyltransferase in rice. *Plant Physiol*  
615 160: 319-331
- 616 Kumar S, Stecher G, Li M, Knyaz C, Tamura K (2018) MEGA X: Molecular Evolutionary Genetics Analysis

- 617 across Computing Platforms. *Mol Biol Evol* 35: 1547-1549
- 618 Kurakawa T, Ueda N, Maekawa M, Kobayashi K, Kojima M, Nagato Y, Sakakibara H, Kyozuka J (2007) Direct  
619 control of shoot meristem activity by a cytokinin-activating enzyme. *Nature* 445: 652-655
- 620 Li S, Zhao B, Yuan D, Duan M, Qian Q, Tang L, Wang B, Liu X, Zhang J, Wang J, Sun J, Liu Z, Feng YQ, Yuan  
621 L, Li C (2013) Rice zinc finger protein DST enhances grain production through controlling  
622 Gn1a/OsCKX2 expression. *Proc Natl Acad Sci U S A* 110: 3167-3172
- 623 Madeira F, Park YM, Lee J, Buso N, Gur T, Madhusoodanan N, Basutkar P, Tivey ARN, Potter SC, Finn RD,  
624 Lopez R (2019) The EMBL-EBI search and sequence analysis tools APIs in 2019. *Nucleic Acids Res*  
625 47: W636-W641
- 626 Mao C, He J, Liu L, Deng Q, Yao X, Liu C, Qiao Y, Li P, Ming F (2020) OsNAC2 integrates auxin and cytokinin  
627 pathways to modulate rice root development. *Plant Biotechnol J* 18: 429-442
- 628 Mao Y, Zhang H, Xu N, Zhang B, Gou F, Zhu JK (2013) Application of the CRISPR-Cas system for efficient  
629 genome engineering in plants. *Mol Plant* 6: 2008-2011
- 630 Niemann MCE, Weber H, Hluska T, Leonte G, Anderson SM, Novak O, Senes A, Werner T (2018) The  
631 Cytokinin Oxidase/Dehydrogenase CKX1 Is a Membrane-Bound Protein Requiring  
632 Homooligomerization in the Endoplasmic Reticulum for Its Cellular Activity. *Plant Physiol* 176:  
633 2024-2039
- 634 Osugi A, Kojima M, Takebayashi Y, Ueda N, Kiba T, Sakakibara H (2017) Systemic transport of trans-zeatin and  
635 its precursor have differing roles in Arabidopsis shoots. *Nat Plants* 3: 17112
- 636 Romanov GA, Schmulling T (2021) Opening Doors for Cytokinin Trafficking at the ER Membrane. *Trends Plant*  
637 *Sci*
- 638 Sakamoto T, Sakakibara H, Kojima M, Yamamoto Y, Nagasaki H, Inukai Y, Sato Y, Matsuoka M (2006) Ectopic  
639 expression of KNOTTED1-like homeobox protein induces expression of cytokinin biosynthesis genes  
640 in rice. *Plant Physiol* 142: 54-62
- 641 Schwarz I, Scheirlinck MT, Otto E, Bartrina I, Schmidt RC, Schmulling T (2020) Cytokinin regulates the  
642 activity of the inflorescence meristem and components of seed yield in oilseed rape. *J Exp Bot*
- 643 Shin SY, Jeong JS, Lim JY, Kim T, Park JH, Kim JK, Shin C (2018) Transcriptomic analyses of rice (*Oryza*  
644 *sativa*) genes and non-coding RNAs under nitrogen starvation using multiple omics technologies. *BMC*  
645 *Genomics* 19: 532
- 646 Simaskova M, O'Brien JA, Khan M, Van Noorden G, Otvos K, Vieten A, De Clercq I, Van Haperen JMA, Cuesta  
647 C, Hoyerova K, Vanneste S, Marhavy P, Wabnik K, Van Breusegem F, Nowack M, Murphy A, Friml J,  
648 Weijers D, Beeckman T, Benkova E (2015) Cytokinin response factors regulate PIN-FORMED auxin  
649 transporters. *Nat Commun* 6: 8717
- 650 Takeda T, Suwa Y, Suzuki M, Kitano H, Ueguchi-Tanaka M, Ashikari M, Matsuoka M, Ueguchi C (2003) The  
651 OsTB1 gene negatively regulates lateral branching in rice. *Plant J* 33: 513-520
- 652 Tezuka D, Ito A, Mitsuhashi W, Toyomasu T, Imai R (2015) The rice ent-KAURENE SYNTHASE LIKE 2  
653 encodes a functional ent-beyerene synthase. *Biochem Biophys Res Commun* 460: 766-771
- 654 Tsai YC, Weir NR, Hill K, Zhang W, Kim HJ, Shiu SH, Schaller GE, Kieber JJ (2012) Characterization of genes  
655 involved in cytokinin signaling and metabolism from rice. *Plant Physiol* 158: 1666-1684
- 656 Waldie T, Leyser O (2018) Cytokinin Targets Auxin Transport to Promote Shoot Branching. *Plant Physiol* 177:  
657 803-818
- 658 Wang J, Xu H, Li N, Fan F, Wang L, Zhu Y, Li S (2015) Artificial Selection of Gn1a Plays an Important role in  
659 Improving Rice Yields Across Different Ecological Regions. *Rice (N Y)* 8: 37
- 660 Wang WC, Lin TC, Kieber J, Tsai YC (2019) Response Regulators 9 and 10 Negatively Regulate Salinity

- 
- 661 Tolerance in Rice. *Plant Cell Physiol* 60: 2549-2563
- 662 Wang Y, Lu Y, Guo Z, Ding Y, Ding C (2020) RICE CENTRORADIALIS 1, a TFL1-like Gene, Responses to  
663 Drought Stress and Regulates Rice Flowering Transition. *Rice (N Y)* 13: 70
- 664 Werner T, Motyka V, Strnad M, Schmulling T (2001) Regulation of plant growth by cytokinin. *Proc Natl Acad  
665 Sci U S A* 98: 10487-10492
- 666 Xu J, Zha M, Li Y, Ding Y, Chen L, Ding C, Wang S (2015) The interaction between nitrogen availability and  
667 auxin, cytokinin, and strigolactone in the control of shoot branching in rice (*Oryza sativa* L.). *Plant Cell  
668 Rep* 34: 1647-1662
- 669 Yang J, Cho LH, Yoon J, Yoon H, Wai AH, Hong WJ, Han M, Sakakibara H, Liang W, Jung KH, Jeon JS, Koh  
670 HJ, Zhang D, An G (2018) Chromatin interacting factor OsVIL2 increases biomass and rice grain yield.  
671 *Plant Biotechnol J*
- 672 Yeh SY, Chen HW, Ng CY, Lin CY, Tseng TH, Li WH, Ku MS (2015) Down-Regulation of Cytokinin Oxidase 2  
673 Expression Increases Tiller Number and Improves Rice Yield. *Rice (N Y)* 8: 36
- 674 Yu C, Liu Y, Zhang A, Su S, Yan A, Huang L, Ali I, Liu Y, Forde BG, Gan Y (2015) MADS-box transcription  
675 factor OsMADS25 regulates root development through affection of nitrate accumulation in rice. *PLoS  
676 One* 10: e0135196
- 677 Zalabak D, Galuszka P, Mrizova K, Podlesakova K, Gu R, Frebortova J (2014) Biochemical characterization of  
678 the maize cytokinin dehydrogenase family and cytokinin profiling in developing maize plantlets in  
679 relation to the expression of cytokinin dehydrogenase genes. *Plant Physiol Biochem* 74: 283-293
- 680 Zalabak D, Johnova P, Plihal O, Senkova K, Samajova O, Jiskrova E, Novak O, Jackson D, Mohanty A,  
681 Galuszka P (2016) Maize cytokinin dehydrogenase isozymes are localized predominantly to the  
682 vacuoles. *Plant Physiol Biochem* 104: 114-124
- 683 Zalewski W, Galuszka P, Gasparis S, Orczyk W, Nadolska-Orczyk A (2010) Silencing of the HvCKX1 gene  
684 decreases the cytokinin oxidase/dehydrogenase level in barley and leads to higher plant productivity. *J  
685 Exp Bot* 61: 1839-1851
- 686 Zhang L, Zhao YL, Gao LF, Zhao GY, Zhou RH, Zhang BS, Jia JZ (2012) TaCKX6-D1, the ortholog of rice  
687 OsCKX2, is associated with grain weight in hexaploid wheat. *New Phytol* 195: 574-584
- 688 Zhang W, Peng KX, Cui FB, Wang DL, Zhao JZ, Zhang YJ, Yu NN, Wang YY, Zeng DL, Wang YH, Cheng ZK,  
689 Zhang KW (2020) Cytokinin oxidase/dehydrogenase OsCKX11 coordinates source and sink  
690 relationship in rice by simultaneous regulation of leaf senescence and grain number. *Plant  
691 Biotechnology Journal*
- 692 Zhao Y, Hu Y, Dai M, Huang L, Zhou DX (2009) The WUSCHEL-related homeobox gene WOX11 is required to  
693 activate shoot-borne crown root development in rice. *Plant Cell* 21: 736-748
- 694 Zou J, Chen Z, Zhang S, Zhang W, Jiang G, Zhao X, Zhai W, Pan X, Zhu L (2005) Characterizations and fine  
695 mapping of a mutant gene for high tillering and dwarf in rice (*Oryza sativa* L.). *Planta* 222: 604-612



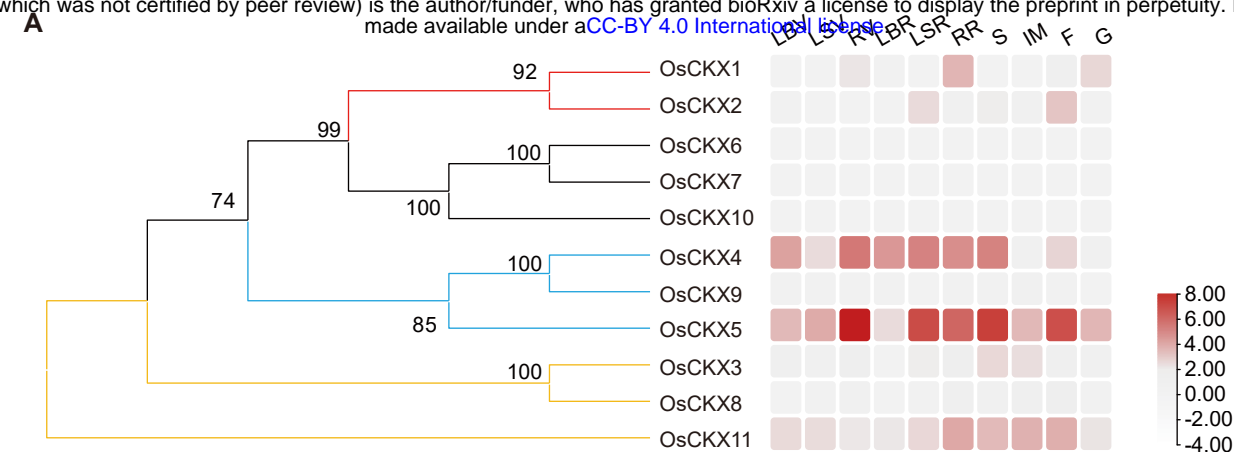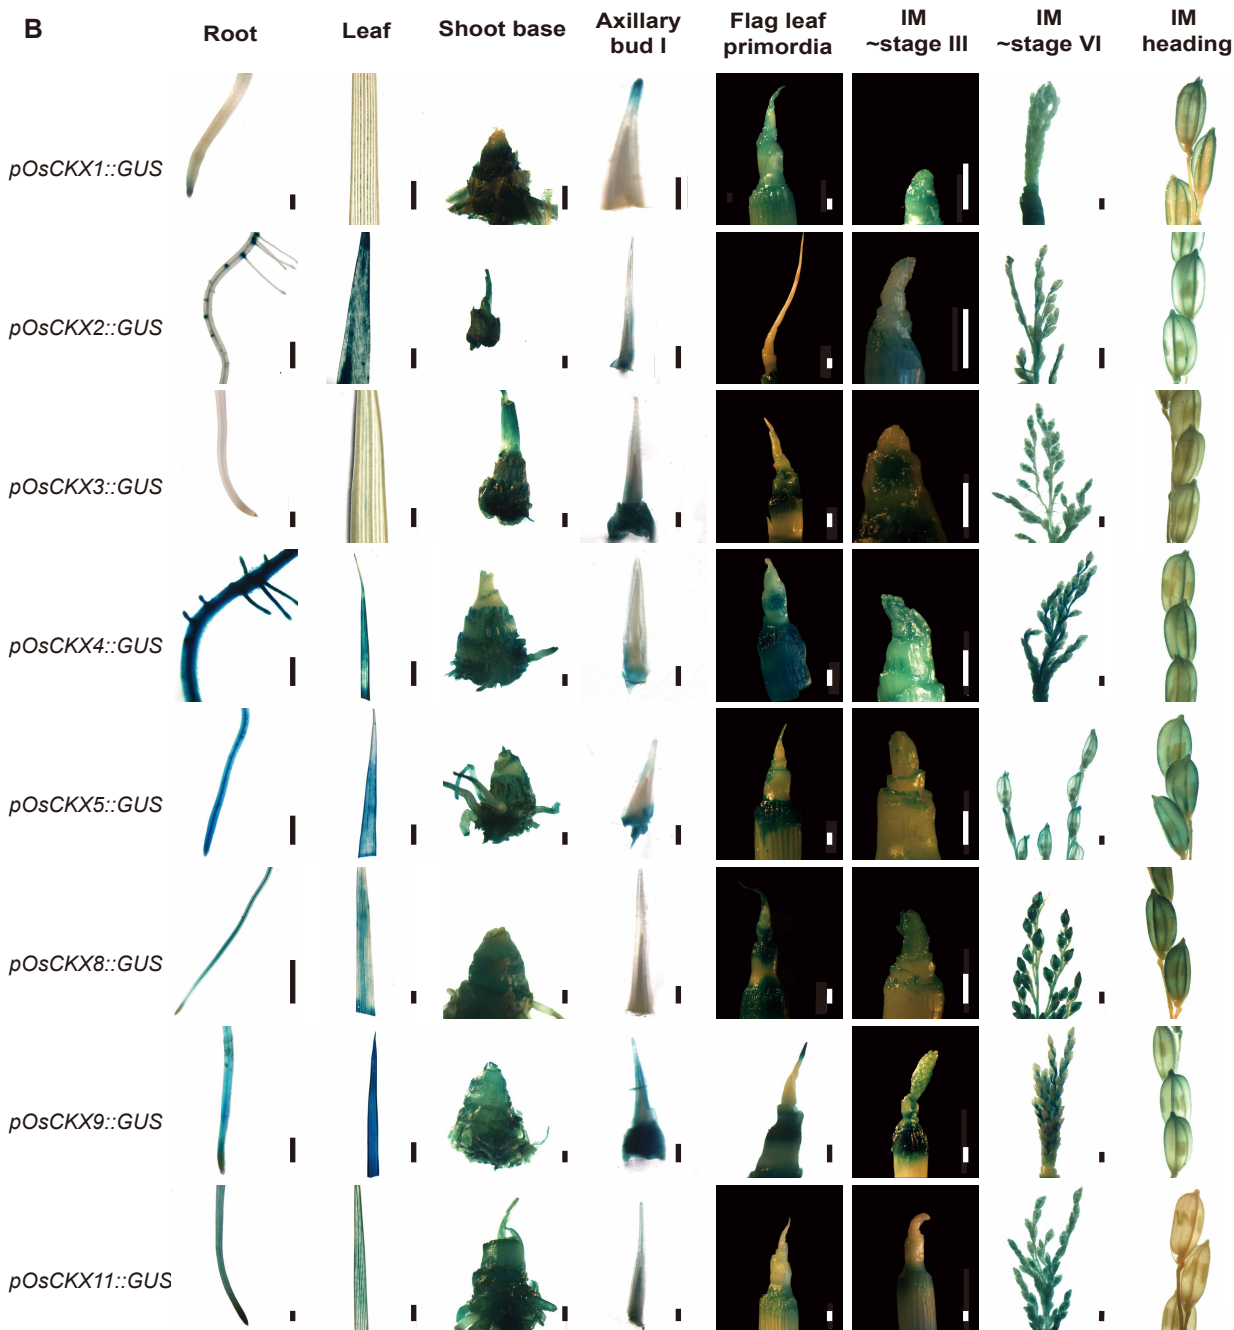

**Figure 1. Genetic relationship and expression patterns of *OsCKX* genes based on RNA sequencing data and GUS staining assay.** A, Genetic relationship and expression patterns of *OsCKX* genes investigated in the leaf blade at the vegetative stage (LBV), leaf sheath at the vegetative stage (LSV), root at the vegetative stage (RV), leaf blade at the reproductive stage (LBR), leaf sheath at the reproductive stage (LSR), root at the reproductive stage (RR), stem (S), inflorescence meristem (IM), flower (F), and grain (G). The expression pattern was based on  $\log_2$  Fragments Per Kilobase of exon model per Million mapped fragments (FPKM) values. B, Histochemical GUS staining of *pOsCKX::GUS* transgenic plants at various developmental stages. The scale bar in B was 1 mm.

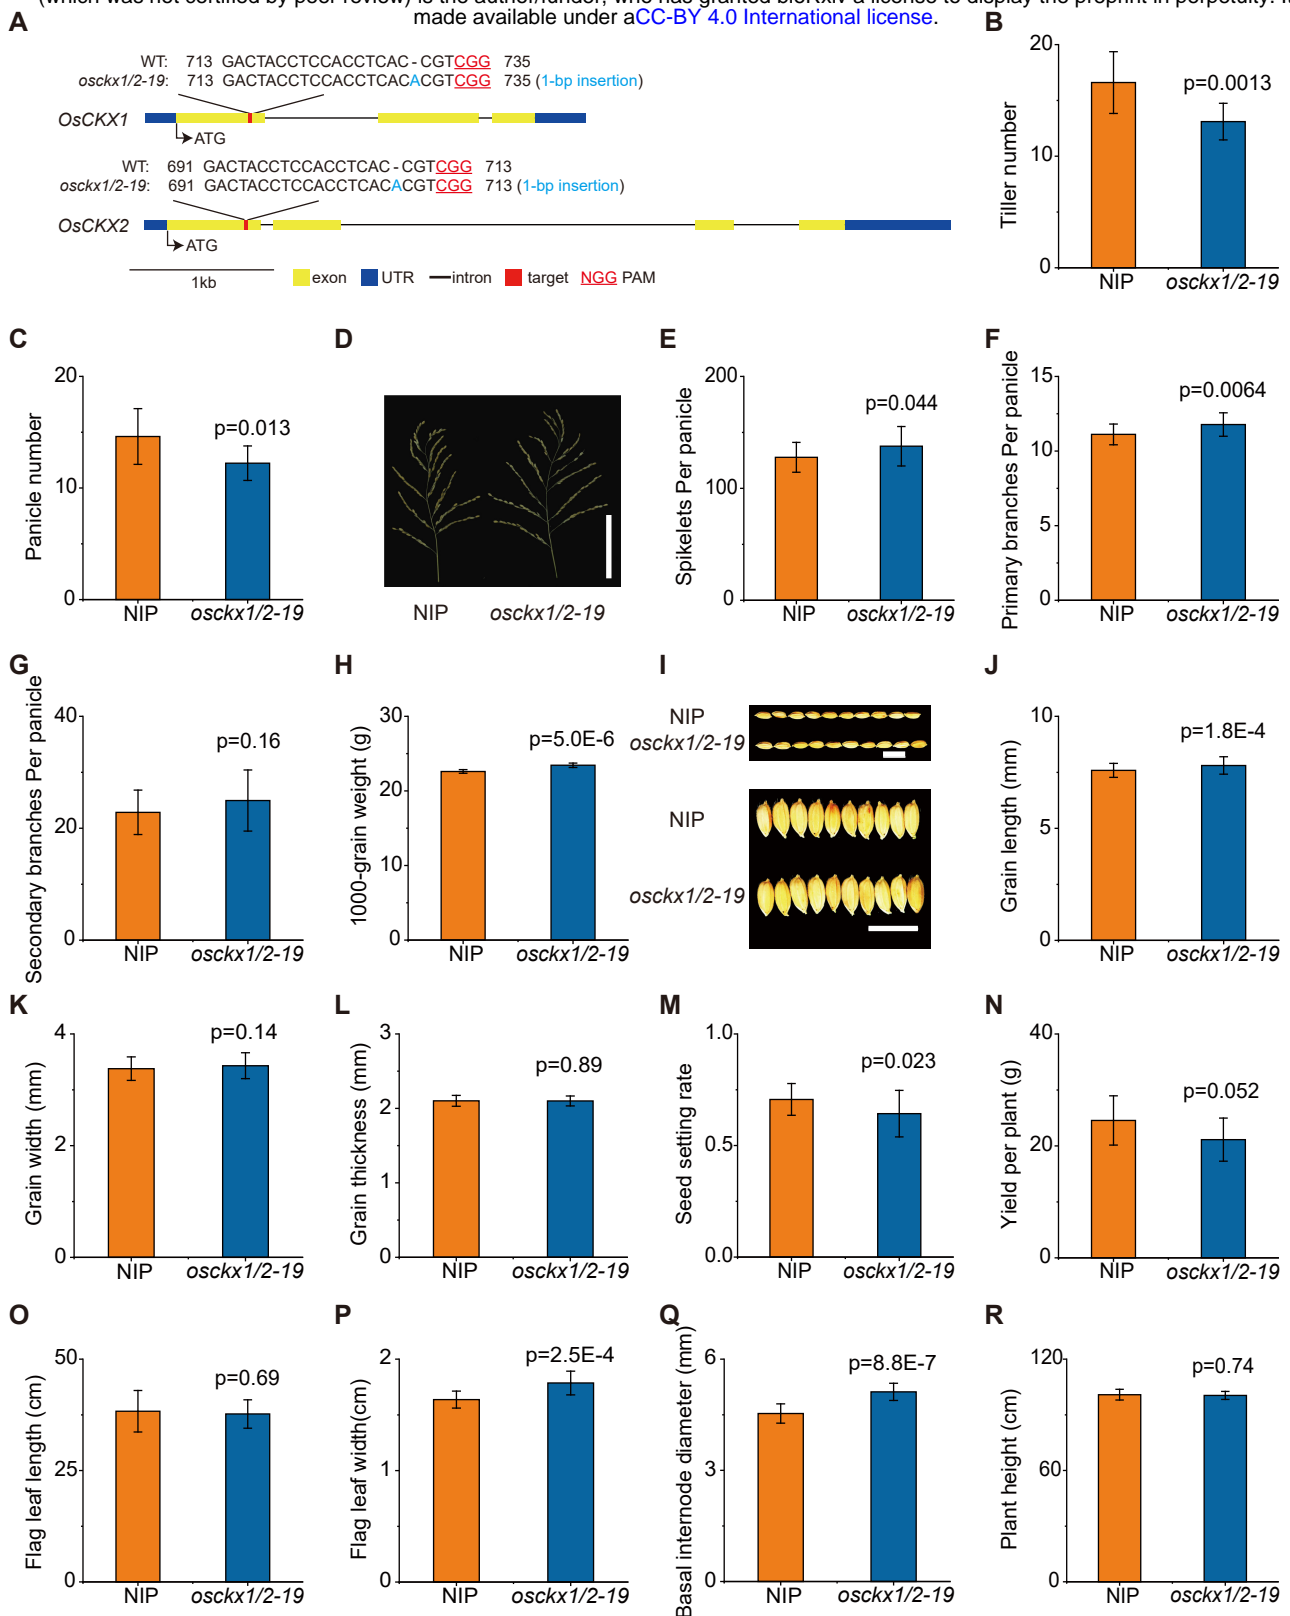

**Figure 2. Genetic and phenotypic characterization between wild-type (WT) and *osckx1/2-19* mutant plants.**

**A**, Mutation details of the coding sequences in the *OsCKX1* and *OsCKX2* of *osckx1/2-19* mutant. Both *OsCKX1* and *OsCKX2* had functional loss due to the 1-bp insertion caused by frameshift mutation. The solid yellow, blue, and red boxes represent the exons, untranslated regions, and target sequences, respectively. The introns are shown as solid lines, while protospacer adjacent motif (PAM) sequences are shown in red color and underlined with red. **B**, Number of tillers at the vegetative stage 70 days after sowing. **C**, Panicles at the reproductive stage ( $n = 20$  for Nipponbare [NIP],  $n = 10$  for *osckx1/2-19*). **D**, Panicle phenotypes of NIP and *osckx1/2-19* plants. The image was digitally extracted and scaled for comparison (scale bar = 10 cm). **E–H**, Measurement of the spikelets per panicle (**E**), primary branches per panicle (**F**), secondary branches per panicle (**G**), 1,000-grain weight (**H**) ( $n > 20$  for **E–G**,  $n = 5$  for **H**) and *osckx1/2-19* ( $n > 10$  for **E–G**,  $n = 5$  for **H**) plants. **I**, Grain phenotypes of NIP and *osckx1/2-19* plants. The image was digitally extracted and scaled for comparison (scale bar = 1 cm). **J–R**, Measurement of the grain length (**J**), grain weight (**K**), and grain thickness (**L**), seed setting rate (**M**), yield per plant (**N**), length of flag leaves (**O**), width of flag leaves (**P**), basal internode diameter (**Q**), and plant height (**R**) of NIP ( $n > 50$  for **J–L**,  $n > 20$  for **M–Q**) and *osckx1/2-19* ( $n > 50$  for **J–L**,  $n > 10$  for **M–Q**) plants. The P-values indicate the significant differences between NIP and *osckx1/2-19* determined by Student's *t*-test.

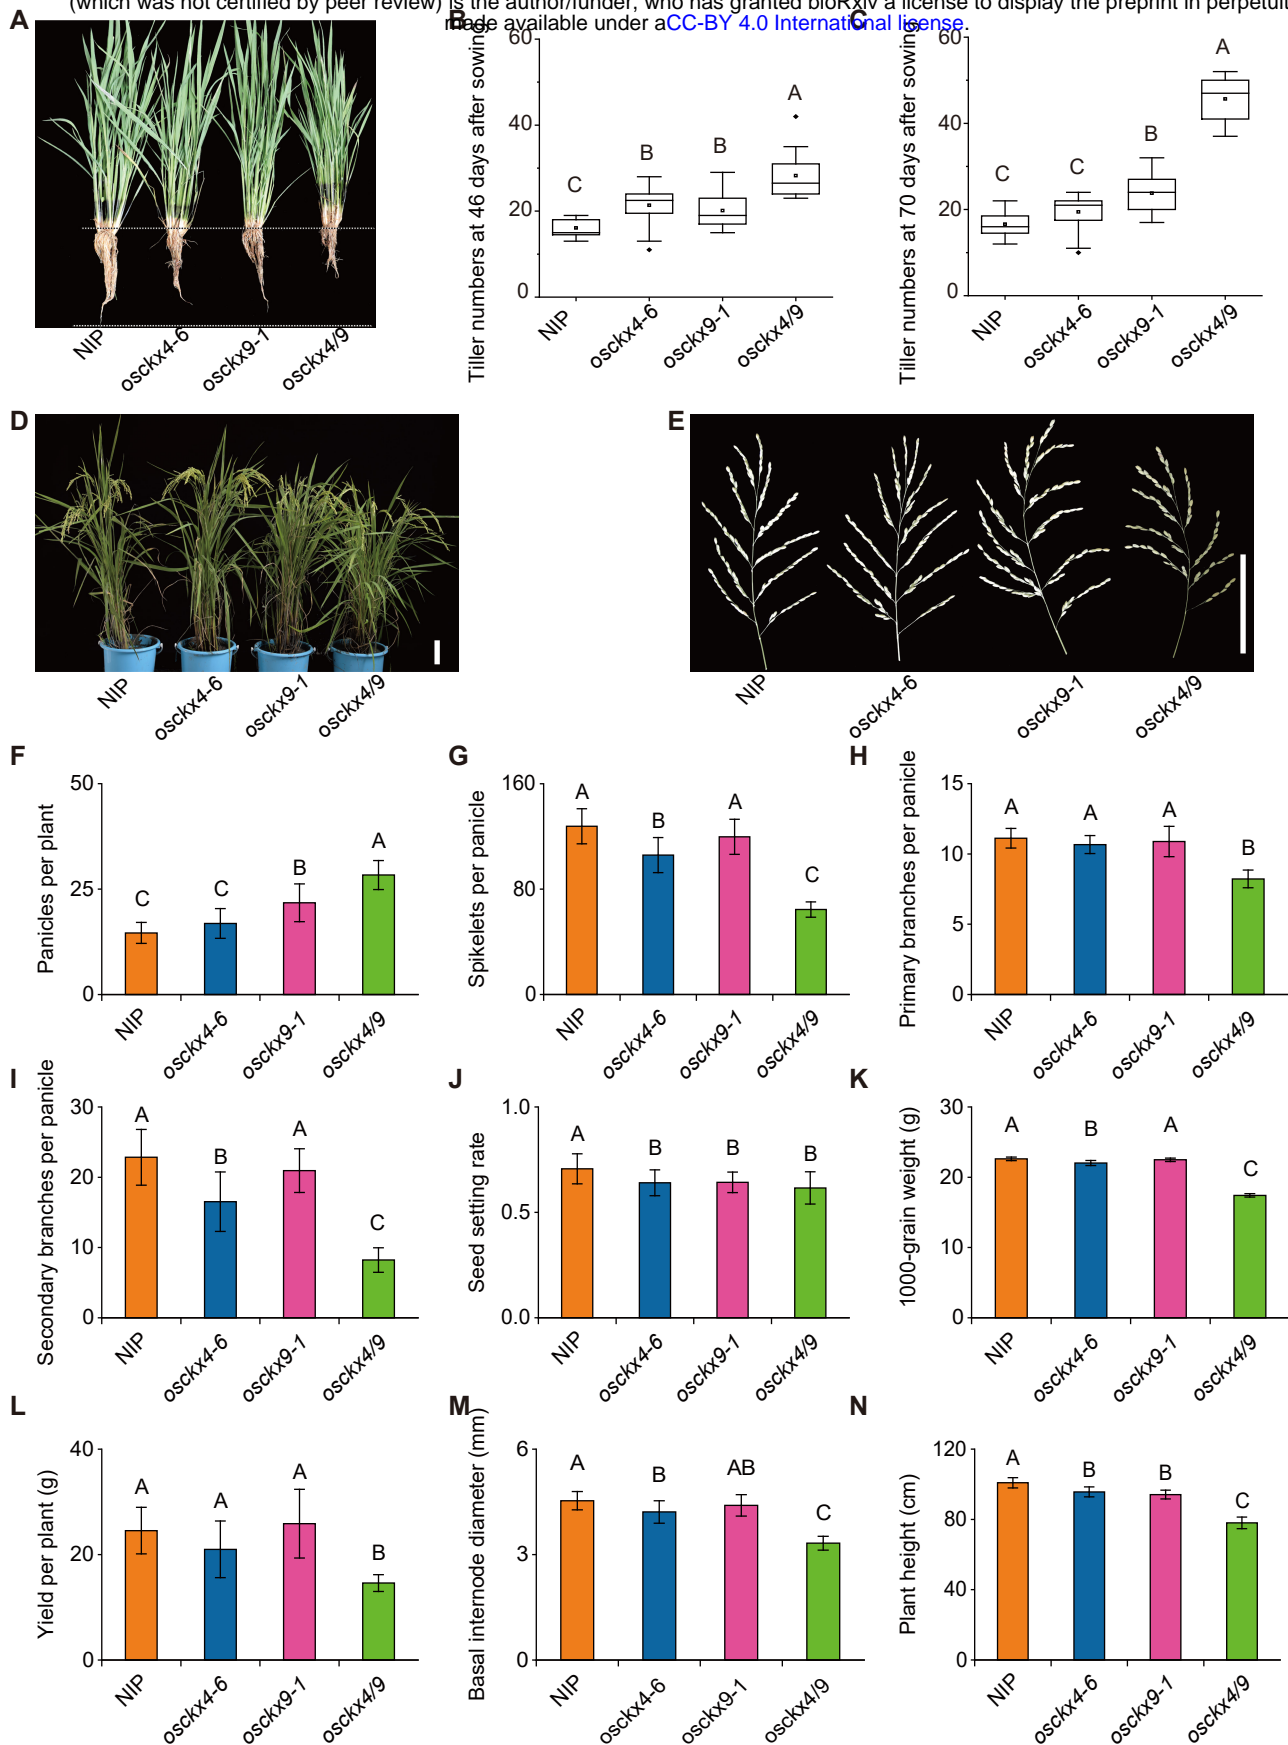

**Figure 3. Phenotypic characterization between wild-type (WT) and *osckx4*, *osckx9*, and *osckx4/9* mutant plants from the field experiment.** A, Phenotypic features of Nipponbare (NIP), *osckx4-6*, *osckx9-1* and *osckx4/9* seedlings at the vegetative stage 46 days after sowing. The image was digitally extracted and scaled for comparison (scale bar = 10 cm). B–C, Number of tillers at the vegetative stage 46 days after sowing (B) and reproductive stage 70 days after sowing (C) ( $n > 20$  for NIP, *osckx4-6*, and *osckx9-1*,  $n = 10$  for *osckx4/9*). D–E, Habits (D) and panicle phenotypes (E) of NIP, *osckx4-6*, *osckx9-1*, and *osckx4/9* plants at the mature stage. The image was digitally extracted and scaled for comparison (scale bar = 10 cm). F–N, Measurement of the panicle number (F), spikelets per panicle (G), seed setting rate (H), 1,000-grain weight (I), yield per plant (J), plant height (K), primary branches per panicle (L), secondary branches per panicle (M), and diameter of basal internode of NIP (N), *osckx4-6*, *osckx9-1* ( $n > 20$  for F–H and J–N,  $n = 5$  for I), and *osckx4/9* ( $n > 10$  for F–H and J–N,  $n = 5$  for I). Different capital letters represent significant differences ( $P < 0.01$ ) determined by one-way ANOVA and shortest significant ranges (SSR) test.

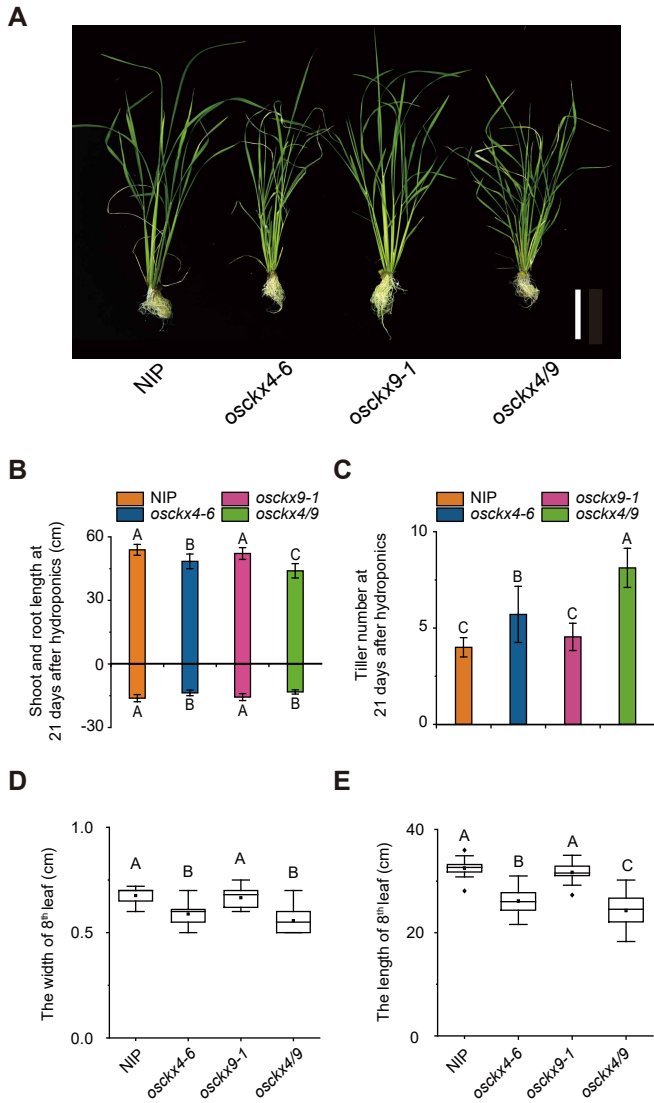

**Figure 4. Phenotypic characterization between wild-type (WT) and *osckx4*, *osckx9*, and *osckx4/9* mutant plants from the hydroponic experiment.** A, Phenotypic features of Nipponbare (NIP), *osckx4-6*, *osckx9-1*, and *osckx4/9* seedlings 21 days after transferring to hydroponic solutions. The image was digitally extracted and scaled for comparison (scale bar = 10 cm). B–E, Measurement of the shoot and root lengths (B), tiller numbers (C), length of 8th leaf (D), and width of 8th leaf (E) of NIP, *osckx4-6*, *osckx9-1*, and *osckx4/9* seedlings (n = 24 each). Different capital letters represent significant differences (P < 0.01) determined by one-way ANOVA and SSR test.

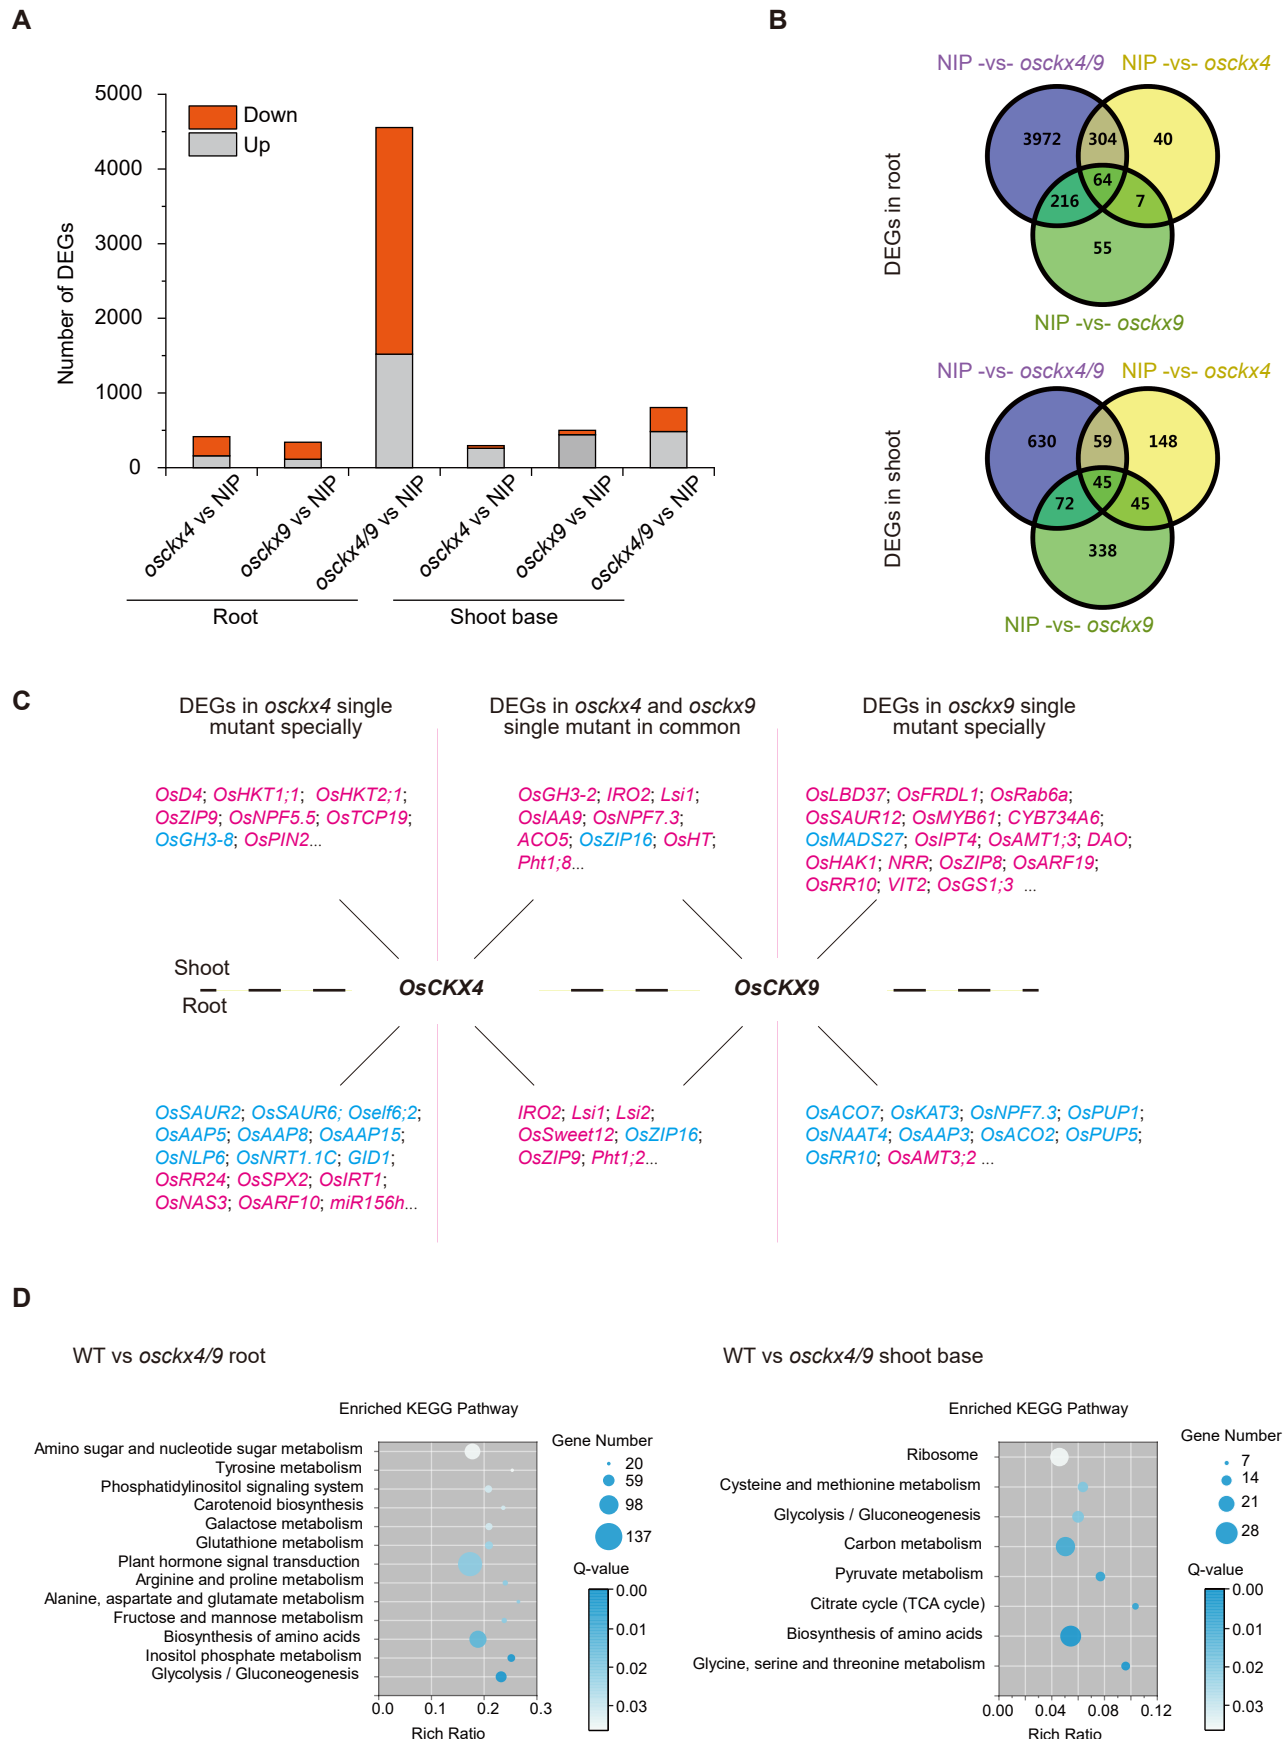

**Figure 5.** RNA-seq analysis of the roots and shoot bases (BP) between wild-type (WT) and *osckx4*, *osckx9*, and *osckx4/9* mutant plants. **A**, The number of differentially expressed genes (DEGs) identified in the roots and shoot bases of the following pairwise comparisons: Nipponbare (NIP) vs. *osckx4*, NIP vs. *osckx9*, and NIP vs. *osckx4/9*. The changes in gene expression levels were calculated using the  $\log_2$  fold change and Q values from three biological replicates. **B**, Overlapping DEGs in the roots and shoot bases (BP) of NIP vs. *osckx4*, NIP vs. *osckx9*, and NIP vs. *osckx4/9*. **C**, DEGs in *osckx4* and *osckx9* specifically and in common in the roots and shoots, genes in magenta are upregulated; genes in sky blue are down-regulated. **D**, Top enriched Kyoto Encyclopedia of Genes and Genomes (KEGG) pathways of the DEGs identified in the roots and shoot bases of NIP vs. *osckx4/9*.

A

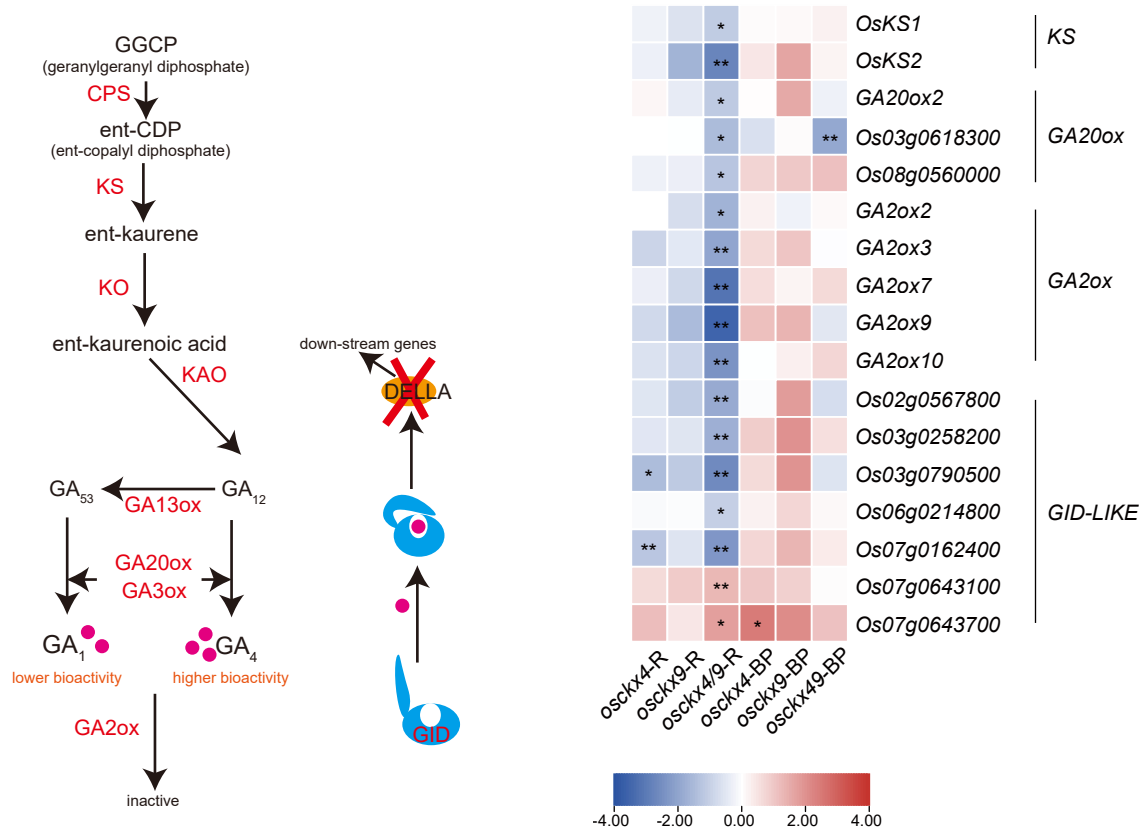

B

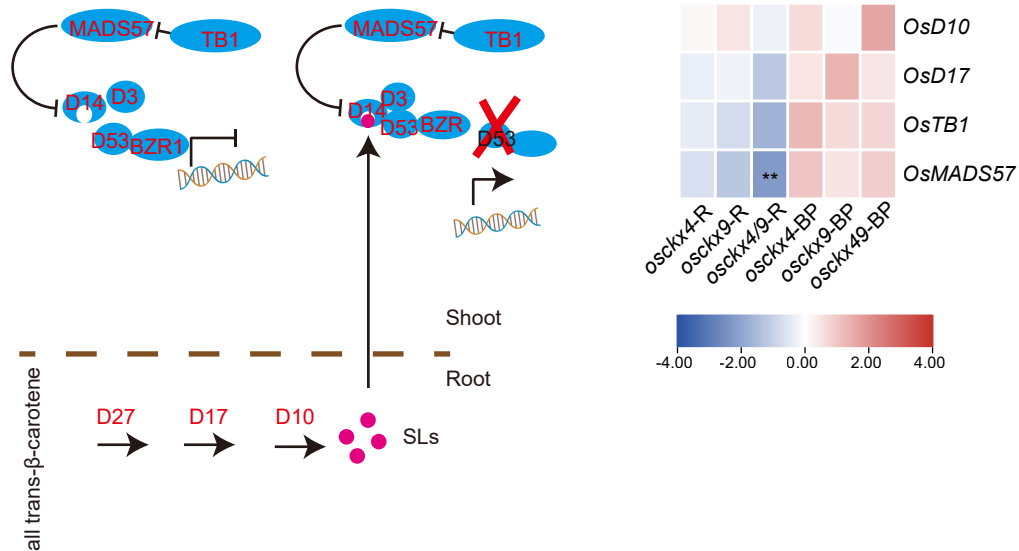

**Figure 6.** OsCKX4 and OsCKX9 are associated with several signal transduction pathways. A, Differentially expressed genes (DEGs) related to gibberellin metabolism and signaling transduction. B, DEGs related to strigolactone biosynthesis and signaling transduction. \* Q < 0.05, \*\* Q < 0.01.

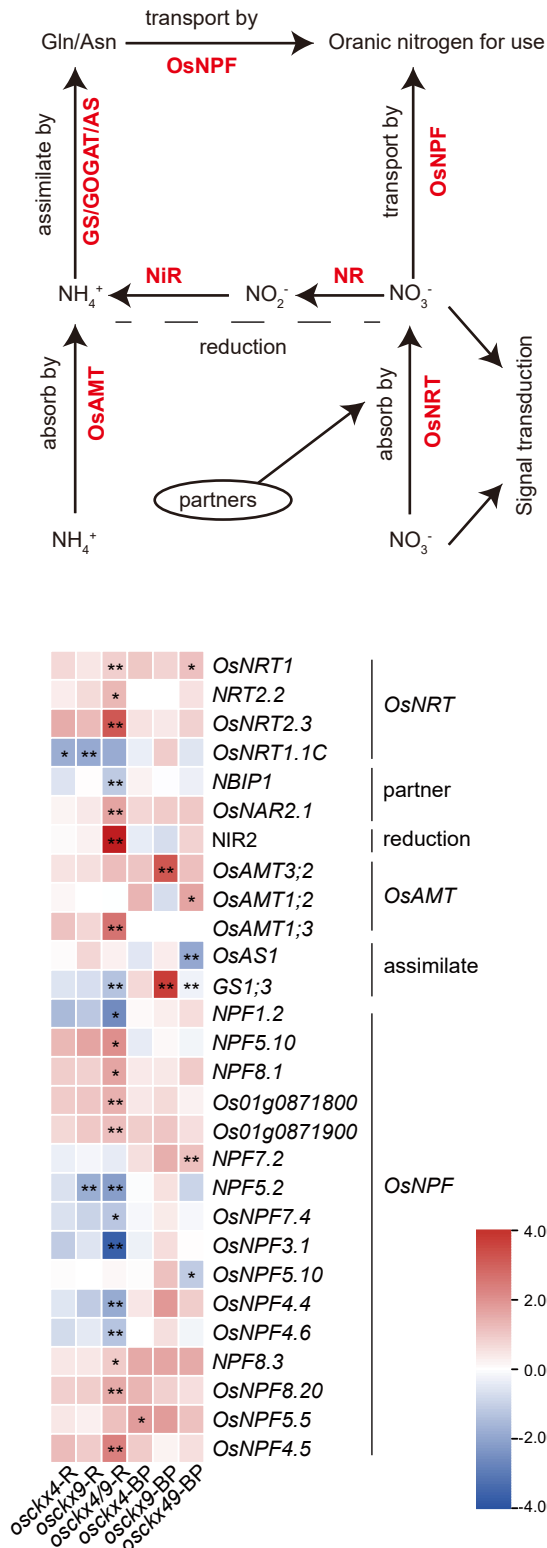

**Figure 7.** *OsCKX4* and *OsCKX9* associated with nitrogen absorption. Differentially expressed genes related to nitrogen absorption, metabolism, and transportation. \*  $Q < 0.05$ , \*\*  $Q < 0.01$ .

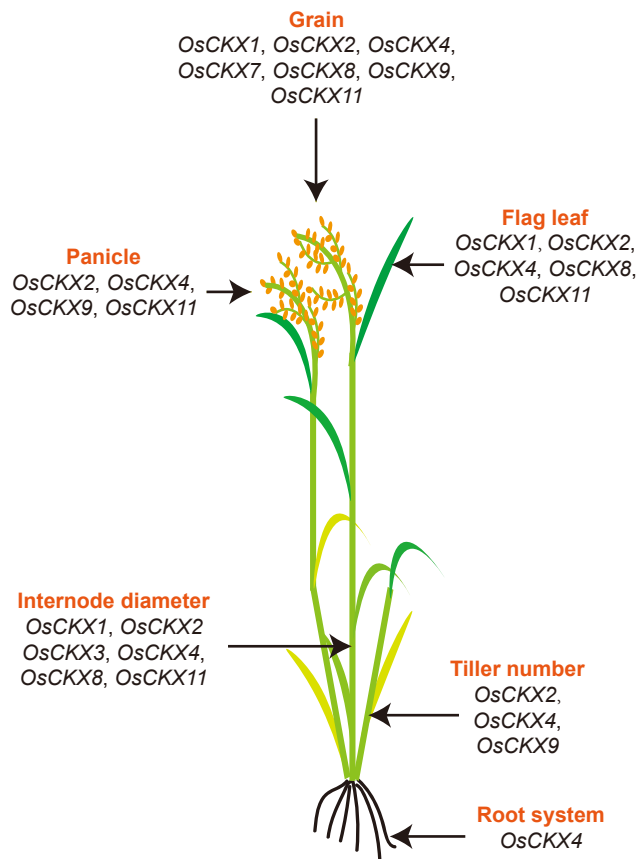

**Figure 8.** Patterns of *OsCKX* genes in rice.



## Parsed Citations

- Arite T, Iwata H, Ohshima K, Maekawa M, Nakajima M, Kojima M, Sakakibara H, Kyojuka J (2007) DWARF10, an RMS1/MAX4/DAD1 ortholog, controls lateral bud outgrowth in rice. Plant J 51: 1019-1029**  
Google Scholar: [Author Only](#) [Title Only](#) [Author and Title](#)
- Ashikari M, Sakakibara H, Lin S, Yamamoto T, Takashi T, Nishimura A, Angeles ER, Qian Q, Kitano H, Matsuoka M (2005) Cytokinin oxidase regulates rice grain production. Science 309: 741-745**  
Google Scholar: [Author Only](#) [Title Only](#) [Author and Title](#)
- Bartrina I, Otto E, Strnad M, Werner T, Schumling T (2011) Cytokinin regulates the activity of reproductive meristems, flower organ size, ovule formation, and thus seed yield in Arabidopsis thaliana. Plant Cell 23: 69-80**  
Google Scholar: [Author Only](#) [Title Only](#) [Author and Title](#)
- Chen L, Zhao J, Song J, Jameson PE (2020) Cytokinin dehydrogenase: a genetic target for yield improvement in wheat. Plant Biotechnol J 18: 614-630**  
Google Scholar: [Author Only](#) [Title Only](#) [Author and Title](#)
- Chen Y, Fan X, Song W, Zhang Y, Xu G (2012) Over-expression of OsPIN2 leads to increased tiller numbers, angle and shorter plant height through suppression of OsLAZY1. Plant Biotechnol J 10: 139-149**  
Google Scholar: [Author Only](#) [Title Only](#) [Author and Title](#)
- Ding C, You J, Chen L, Wang S, Ding Y (2014) Nitrogen fertilizer increases spikelet number per panicle by enhancing cytokinin synthesis in rice. Plant Cell Rep 33: 363-371**  
Google Scholar: [Author Only](#) [Title Only](#) [Author and Title](#)
- Duan J, Yu H, Yuan K, Liao Z, Meng X, Jing Y, Liu G, Chu J, Li J (2019) Strigolactone promotes cytokinin degradation through transcriptional activation of CYTOKININ OXIDASE/DEHYDROGENASE 9 in rice. Proc Natl Acad Sci U S A 116: 14319-14324**  
Google Scholar: [Author Only](#) [Title Only](#) [Author and Title](#)
- Gao S, Fang J, Xu F, Wang W, Sun X, Chu J, Cai B, Feng Y, Chu C (2014) CYTOKININ OXIDASE/DEHYDROGENASE4 Integrates Cytokinin and Auxin Signaling to Control Rice Crown Root Formation. Plant Physiol 165: 1035-1046**  
Google Scholar: [Author Only](#) [Title Only](#) [Author and Title](#)
- Gao S, Xiao Y, Xu F, Gao X, Cao S, Zhang F, Wang G, Sanders D, Chu C (2019) Cytokinin-dependent regulatory module underlies the maintenance of zinc nutrition in rice. New Phytol 224: 202-215**  
Google Scholar: [Author Only](#) [Title Only](#) [Author and Title](#)
- Guo S, Xu Y, Liu H, Mao Z, Zhang C, Ma Y, Zhang Q, Meng Z, Chong K (2013) The interaction between OsMADS57 and OsTB1 modulates rice tillering via DWARF14. Nat Commun 4: 1566**  
Google Scholar: [Author Only](#) [Title Only](#) [Author and Title](#)
- Jameson PE, Song J (2020) Will cytokinins underpin the second 'Green Revolution'? J Exp Bot 71: 6872-6875**  
Google Scholar: [Author Only](#) [Title Only](#) [Author and Title](#)
- Ji SH, Gururani MA, Lee JW, Ahn BO, Chun SC (2014) Isolation and characterisation of a dwarf rice mutant exhibiting defective gibberellins biosynthesis. Plant Biol (Stuttg) 16: 428-439**  
Google Scholar: [Author Only](#) [Title Only](#) [Author and Title](#)
- Joshi R, Sahoo KK, Tripathi AK, Kumar R, Gupta BK, Pareek A, Singla-Pareek SL (2018) Knockdown of an inflorescence meristem-specific cytokinin oxidase - OsCKX2 in rice reduces yield penalty under salinity stress condition. Plant Cell Environ 41: 936-946**  
Google Scholar: [Author Only](#) [Title Only](#) [Author and Title](#)
- Kanehisa M (2019) Toward understanding the origin and evolution of cellular organisms. Protein Science 28: 1947-1951**  
Google Scholar: [Author Only](#) [Title Only](#) [Author and Title](#)
- Kollmer I, Novak O, Strnad M, Schumling T, Werner T (2014) Overexpression of the cytosolic cytokinin oxidase/dehydrogenase (CKX7) from Arabidopsis causes specific changes in root growth and xylem differentiation. Plant J 78: 359-371**  
Google Scholar: [Author Only](#) [Title Only](#) [Author and Title](#)
- Kowalska M, Galuszka P, Frebortova J, Sebela M, Beres T, Hluska T, Smehilova M, Bilyeu KD, Frebort I (2010) Vacuolar and cytosolic cytokinin dehydrogenases of Arabidopsis thaliana: heterologous expression, purification and properties. Phytochemistry 71: 1970-1978**  
Google Scholar: [Author Only](#) [Title Only](#) [Author and Title](#)
- Kudo T, Makita N, Kojima M, Tokunaga H, Sakakibara H (2012) Cytokinin activity of cis-zeatin and phenotypic alterations induced by overexpression of putative cis-Zeatin-O-glucosyltransferase in rice. Plant Physiol 160: 319-331**  
Google Scholar: [Author Only](#) [Title Only](#) [Author and Title](#)
- Kumar S, Stecher G, Li M, Knyaz C, Tamura K (2018) MEGAX: Molecular Evolutionary Genetics Analysis across Computing Platforms. Mol Biol Evol 35: 1547-1549**  
Google Scholar: [Author Only](#) [Title Only](#) [Author and Title](#)
- Kurakawa T, Ueda N, Maekawa M, Kobayashi K, Kojima M, Nagato Y, Sakakibara H, Kyojuka J (2007) Direct control of shoot meristem**

activity by a cytokinin-activating enzyme. *Nature* 445: 652-655

Google Scholar: [Author Only](#) [Title Only](#) [Author and Title](#)

Li S, Zhao B, Yuan D, Duan M, Qian Q, Tang L, Wang B, Liu X, Zhang J, Wang J, Sun J, Liu Z, Feng YQ, Yuan L, Li C (2013) Rice zinc finger protein DST enhances grain production through controlling Gn1a/OsCKX2 expression. *Proc Natl Acad Sci U S A* 110: 3167-3172

Google Scholar: [Author Only](#) [Title Only](#) [Author and Title](#)

Madeira F, Park YM, Lee J, Buso N, Gur T, Madhusoodanan N, Basutkar P, Tivey ARN, Potter SC, Finn RD, Lopez R (2019) The EMBL-EBI search and sequence analysis tools APIs in 2019. *Nucleic Acids Res* 47: W636-W641

Google Scholar: [Author Only](#) [Title Only](#) [Author and Title](#)

Mao C, He J, Liu L, Deng Q, Yao X, Liu C, Qiao Y, Li P, Ming F (2020) OsNAC2 integrates auxin and cytokinin pathways to modulate rice root development. *Plant Biotechnol J* 18: 429-442

Google Scholar: [Author Only](#) [Title Only](#) [Author and Title](#)

Mao Y, Zhang H, Xu N, Zhang B, Gou F, Zhu JK (2013) Application of the CRISPR-Cas system for efficient genome engineering in plants. *Mol Plant* 6: 2008-2011

Google Scholar: [Author Only](#) [Title Only](#) [Author and Title](#)

Niemann MCE, Weber H, Hluska T, Leonte G, Anderson SM, Novak O, Senes A, Werner T (2018) The Cytokinin Oxidase/Dehydrogenase CKX1 Is a Membrane-Bound Protein Requiring Homooligomerization in the Endoplasmic Reticulum for Its Cellular Activity. *Plant Physiol* 176: 2024-2039

Google Scholar: [Author Only](#) [Title Only](#) [Author and Title](#)

Osugi A, Kojima M, Takebayashi Y, Ueda N, Kiba T, Sakakibara H (2017) Systemic transport of trans-zeatin and its precursor have differing roles in Arabidopsis shoots. *Nat Plants* 3: 17112

Google Scholar: [Author Only](#) [Title Only](#) [Author and Title](#)

Romanov GA, Schmulling T (2021) Opening Doors for Cytokinin Trafficking at the ER Membrane. *Trends Plant Sci*

Google Scholar: [Author Only](#) [Title Only](#) [Author and Title](#)

Sakamoto T, Sakakibara H, Kojima M, Yamamoto Y, Nagasaki H, Inukai Y, Sato Y, Matsuoka M (2006) Ectopic expression of KNOTTED1-like homeobox protein induces expression of cytokinin biosynthesis genes in rice. *Plant Physiol* 142: 54-62

Google Scholar: [Author Only](#) [Title Only](#) [Author and Title](#)

Schwarz I, Scheirlinck MT, Otto E, Bartrina I, Schmidt RC, Schmulling T (2020) Cytokinin regulates the activity of the inflorescence meristem and components of seed yield in oilseed rape. *J Exp Bot*

Google Scholar: [Author Only](#) [Title Only](#) [Author and Title](#)

Shin SY, Jeong JS, Lim JY, Kim T, Park JH, Kim JK, Shin C (2018) Transcriptomic analyses of rice (*Oryza sativa*) genes and non-coding RNAs under nitrogen starvation using multiple omics technologies. *BMC Genomics* 19: 532

Google Scholar: [Author Only](#) [Title Only](#) [Author and Title](#)

Simaskova M, O'Brien JA, Khan M, Van Noorden G, Otvos K, Vieten A, De Clercq I, Van Haperen JMA, Cuesta C, Hoyerova K, Vanneste S, Marhavy P, Wabnik K, Van Breusegem F, Nowack M, Murphy A, Friml J, Weijers D, Beeckman T, Benkova E (2015) Cytokinin response factors regulate PIN-FORMED auxin transporters. *Nat Commun* 6: 8717

Google Scholar: [Author Only](#) [Title Only](#) [Author and Title](#)

Takeda T, Suwa Y, Suzuki M, Kitano H, Ueguchi-Tanaka M, Ashikari M, Matsuoka M, Ueguchi C (2003) The OsTB1 gene negatively regulates lateral branching in rice. *Plant J* 33: 513-520

Google Scholar: [Author Only](#) [Title Only](#) [Author and Title](#)

Tezuka D, Ito A, Mitsuhashi W, Toyomasu T, Imai R (2015) The rice ent-KAURENE SYNTHASE LIKE 2 encodes a functional ent-beyerene synthase. *Biochem Biophys Res Commun* 460: 766-771

Google Scholar: [Author Only](#) [Title Only](#) [Author and Title](#)

Tsai YC, Weir NR, Hill K, Zhang W, Kim HJ, Shiu SH, Schaller GE, Kieber JJ (2012) Characterization of genes involved in cytokinin signaling and metabolism from rice. *Plant Physiol* 158: 1666-1684

Google Scholar: [Author Only](#) [Title Only](#) [Author and Title](#)

Waldie T, Leyser O (2018) Cytokinin Targets Auxin Transport to Promote Shoot Branching. *Plant Physiol* 177: 803-818

Google Scholar: [Author Only](#) [Title Only](#) [Author and Title](#)

Wang J, Xu H, Li N, Fan F, Wang L, Zhu Y, Li S (2015) Artificial Selection of Gn1a Plays an Important role in Improving Rice Yields Across Different Ecological Regions. *Rice (N Y)* 8: 37

Google Scholar: [Author Only](#) [Title Only](#) [Author and Title](#)

Wang WC, Lin TC, Kieber J, Tsai YC (2019) Response Regulators 9 and 10 Negatively Regulate Salinity Tolerance in Rice. *Plant Cell Physiol* 60: 2549-2563

Google Scholar: [Author Only](#) [Title Only](#) [Author and Title](#)

Wang Y, Lu Y, Guo Z, Ding Y, Ding C (2020) RICE CENTRORADIALIS 1, a TFL1-like Gene, Responses to Drought Stress and Regulates Rice Flowering Transition. *Rice (N Y)* 13: 70

Google Scholar: [Author Only](#) [Title Only](#) [Author and Title](#)

---

Werner T, Motyka V, Strnad M, Schmulling T (2001) Regulation of plant growth by cytokinin. *Proc Natl Acad Sci U S A* 98: 10487-10492

Google Scholar: [Author Only](#) [Title Only](#) [Author and Title](#)

Xu J, Zha M, Li Y, Ding Y, Chen L, Ding C, Wang S (2015) The interaction between nitrogen availability and auxin, cytokinin, and strigolactone in the control of shoot branching in rice (*Oryza sativa* L.). *Plant Cell Rep* 34: 1647-1662

Google Scholar: [Author Only](#) [Title Only](#) [Author and Title](#)

Yang J, Cho LH, Yoon J, Yoon H, Wai AH, Hong WJ, Han M, Sakakibara H, Liang W, Jung KH, Jeon JS, Koh HJ, Zhang D, An G (2018) Chromatin interacting factor OsVL2 increases biomass and rice grain yield. *Plant Biotechnol J*

Google Scholar: [Author Only](#) [Title Only](#) [Author and Title](#)

Yeh SY, Chen HW, Ng CY, Lin CY, Tseng TH, Li WH, Ku MS (2015) Down-Regulation of Cytokinin Oxidase 2 Expression Increases Tiller Number and Improves Rice Yield. *Rice (N Y)* 8: 36

Google Scholar: [Author Only](#) [Title Only](#) [Author and Title](#)

Yu C, Liu Y, Zhang A, Su S, Yan A, Huang L, Ali I, Liu Y, Forde BG, Gan Y (2015) MADS-box transcription factor OsMADS25 regulates root development through affection of nitrate accumulation in rice. *PLoS One* 10: e0135196

Google Scholar: [Author Only](#) [Title Only](#) [Author and Title](#)

Zalabak D, Galuszka P, Mrizova K, Podlesakova K, Gu R, Frebortova J (2014) Biochemical characterization of the maize cytokinin dehydrogenase family and cytokinin profiling in developing maize plantlets in relation to the expression of cytokinin dehydrogenase genes. *Plant Physiol Biochem* 74: 283-293

Google Scholar: [Author Only](#) [Title Only](#) [Author and Title](#)

Zalabak D, Johnova P, Plihal O, Senkova K, Samajova O, Jiskrova E, Novak O, Jackson D, Mohanty A, Galuszka P (2016) Maize cytokinin dehydrogenase isozymes are localized predominantly to the vacuoles. *Plant Physiol Biochem* 104: 114-124

Google Scholar: [Author Only](#) [Title Only](#) [Author and Title](#)

Zalewski W, Galuszka P, Gasparis S, Orczyk W, Nadolska-Orczyk A (2010) Silencing of the HvCKX1 gene decreases the cytokinin oxidase/dehydrogenase level in barley and leads to higher plant productivity. *J Exp Bot* 61: 1839-1851

Google Scholar: [Author Only](#) [Title Only](#) [Author and Title](#)

Zhang L, Zhao YL, Gao LF, Zhao GY, Zhou RH, Zhang BS, Jia JZ (2012) TaCKX6-D1, the ortholog of rice OsCKX2, is associated with grain weight in hexaploid wheat. *New Phytol* 195: 574-584

Google Scholar: [Author Only](#) [Title Only](#) [Author and Title](#)

Zhang W, Peng KX, Cui FB, Wang DL, Zhao JZ, Zhang YJ, Yu NN, Wang YY, Zeng DL, Wang YH, Cheng ZK, Zhang KW (2020) Cytokinin oxidase/dehydrogenase OsCKX11 coordinates source and sink relationship in rice by simultaneous regulation of leaf senescence and grain number. *Plant Biotechnology Journal*

Google Scholar: [Author Only](#) [Title Only](#) [Author and Title](#)

Zhao Y, Hu Y, Dai M, Huang L, Zhou DX (2009) The WUSCHEL-related homeobox gene WOX11 is required to activate shoot-borne crown root development in rice. *Plant Cell* 21: 736-748

Google Scholar: [Author Only](#) [Title Only](#) [Author and Title](#)

Zou J, Chen Z, Zhang S, Zhang W, Jiang G, Zhao X, Zhai W, Pan X, Zhu L (2005) Characterizations and fine mapping of a mutant gene for high tillering and dwarf in rice (*Oryza sativa* L.). *Planta* 222: 604-612

Google Scholar: [Author Only](#) [Title Only](#) [Author and Title](#)
